# Supplementary material for: Revisiting Concurrent Radiation Therapy, Temozolomide, and the Histone Deacetylase Inhibitor Valproic Acid for Patients with Glioblastoma—Proteomic Alteration and Comparison Analysis with the Standard-of-Care Chemoirradiation
Source: MDPI journal article supplement (doi:10.3390/biom13101499), 2023-10-10
Supplement: s1 [file s1]

Archive with 5 entries (5 files):
- Supplementary figures and tables.pdf
- Supplementary file S1.pdf
- Supplementary file S2.xlsx
- Supplementary file S3.xlsx
- Supplementary file S4.pdf
