# Supplementary material for: Revisiting Concurrent Radiation Therapy, Temozolomide, and the Histone Deacetylase Inhibitor Valproic Acid for Patients with Glioblastoma—Proteomic Alteration and Comparison Analysis with the Standard-of-Care Chemoirradiation
Source: MDPI journal article supplement (doi:10.3390/biom13101499), 2023-10-10
Supplement: s1 [file s1]

Here is the general formula for the Cox Proportional-Hazards Regression Model:

In its most basic form, for a single predictor variable, the model is expressed as:

$$\lambda(t) = \lambda_0(t) * \exp(\beta * X)$$

where

$\lambda(t)$  represents the hazard rate at time  $t$  for an individual.

$\lambda_0(t)$  is the baseline hazard function, which represents the hazard when all predictor variables ( $X$ ) are equal to 0.

$\beta$  is the coefficient associated with the predictor variable  $X$ .

$X$  is the value of the predictor variable.

For multivariate Cox models, the formula extends to:

$$\lambda(t) = \lambda_0(t) * \exp(\beta_1 * X_1 + \beta_2 * X_2 + \dots + \beta_n * X_n)$$

where

$\lambda(t)$  is the hazard rate at time  $t$  for an individual.

$\lambda_0(t)$  is the baseline hazard function.

$\beta_1, \beta_2, \dots, \beta_n$  are the coefficients associated with each of the predictor variables  $X_1, X_2, \dots, X_n$ .

The formula for estimating the Kaplan-Meier survival probability at a specific time point, say " $t$ ," is as follows:

$$S(t) = \prod [1 - (d_i / n_i)]$$

where

$S(t)$  represents the estimated survival probability at time " $t$ ."

$\prod$  denotes the product over all time points " $t_i$ " where " $t_i$ " is less than or equal to " $t$ ."

$d_i$  represents the number of events (e.g., deaths or failures) that occurred at time " $t_i$ ."

$n_i$  represents the number of subjects or patients who were at risk (i.e., still under observation and had not experienced the event) just before time " $t_i$ ."
