# Supplementary material for: Revisiting Concurrent Radiation Therapy, Temozolomide, and the Histone Deacetylase Inhibitor Valproic Acid for Patients with Glioblastoma—Proteomic Alteration and Comparison Analysis with the Standard-of-Care Chemoirradiation
Source: MDPI journal article supplement (doi:10.3390/biom13101499), 2023-10-10
Supplement: s1 [file s1 › Supplementary figures and tables.pdf]

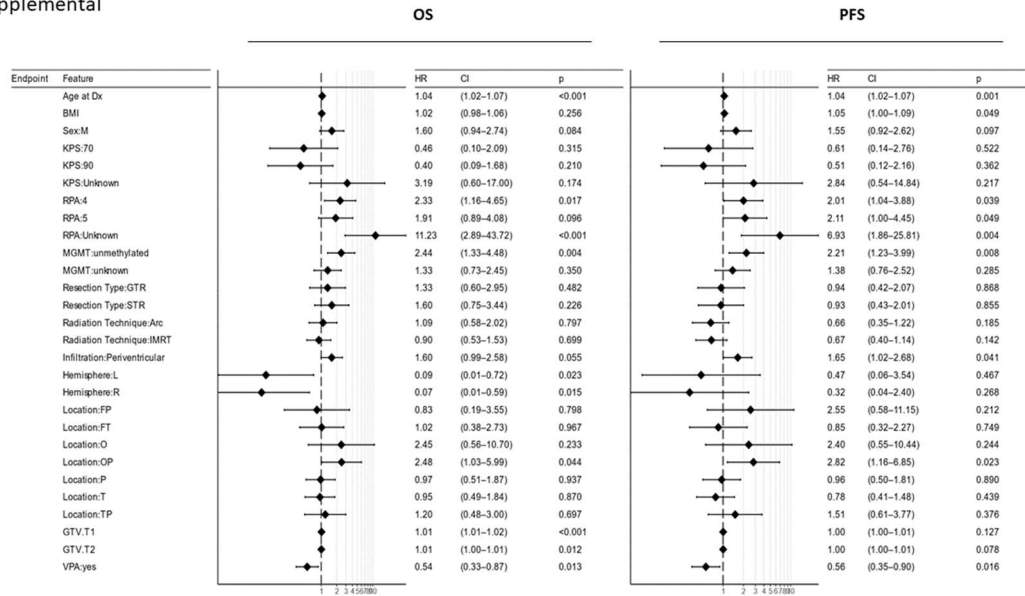

Figure S1: Forest plot for covariates for overall survival (OS) and progression free survival (PFS).

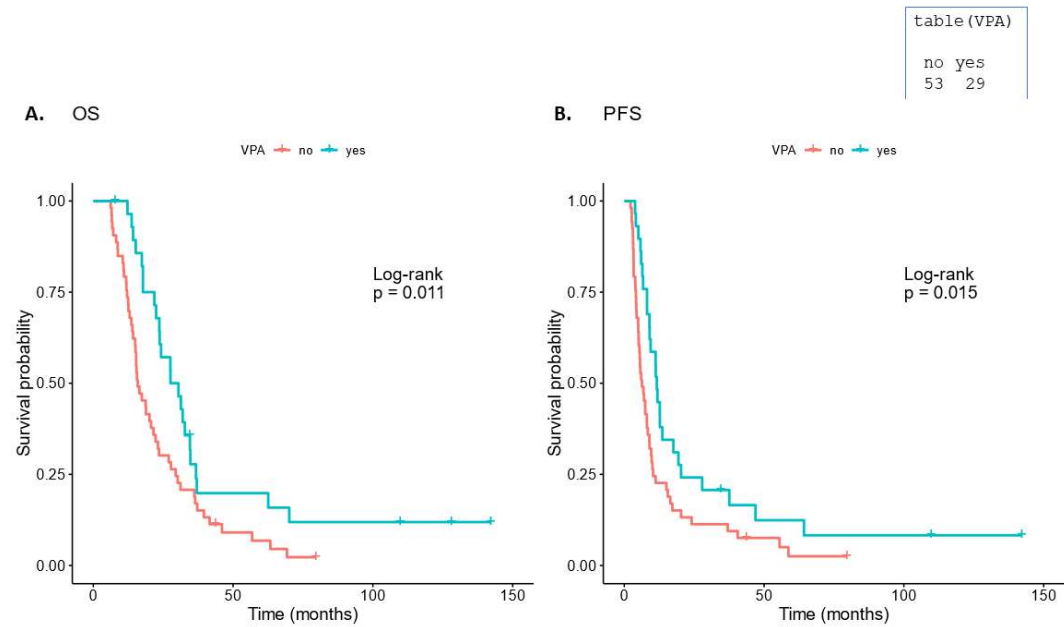

Figure S2: KM curves for OS (A) and PFS (B) for the administration of VPA.

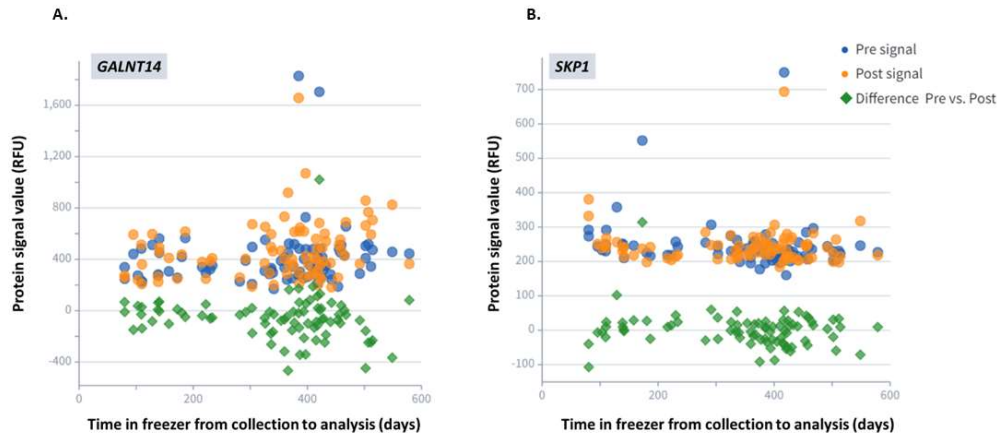

Figure S3: Protein signal vs. time in freezer from collection to analysis in days for (A) GALNT14, statistically significant for OS and PFS in Cox analysis and survival. (B) SKP1, predictive for response to VPA in prediction model.

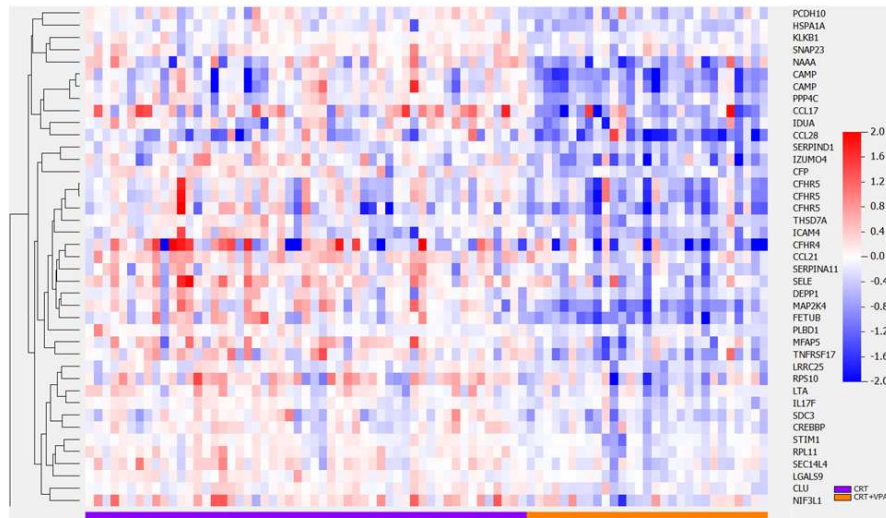

A

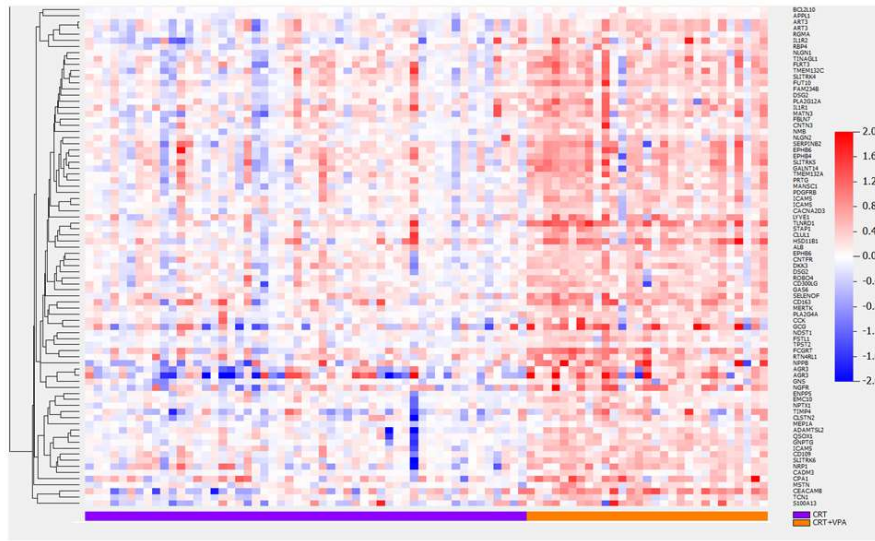

B

Figure S4: Figure 3 displayed as the two separate zoom-in figures with gene names to represent the top (A) and bottom (B) clusters of proteins in the original heatmap.

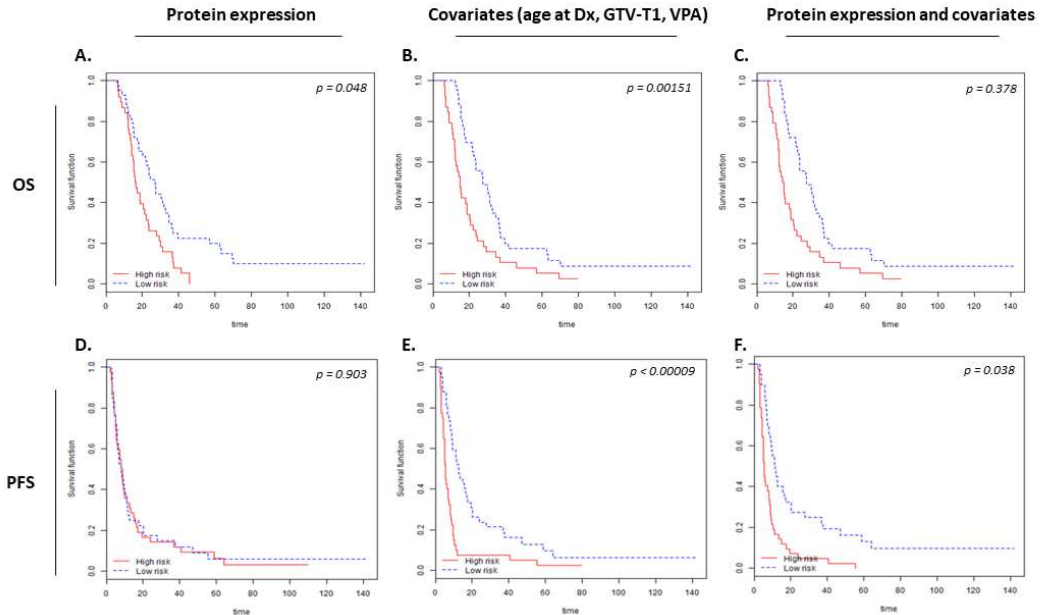

Figure S5: Kaplan Meier curves for survival (OS) (A–C) and progression free survival (PFS) (D–F) with patient population risk stratified (high(red), low (blue)) by protein expression (A,D), covariates (B,E) and combination of protein expression and covariates (C,F) Protein data is based on the results from 123 significantly differentially expressed proteins from class comparison between patients treated with CRT and concurrent VPA vs CRT.

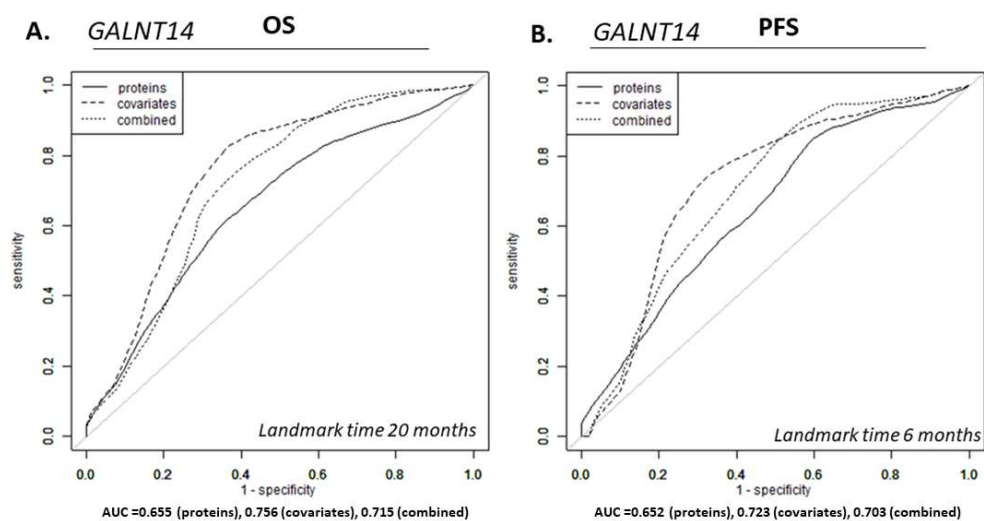

Figure S6: Time-dependent ROC curve for overall survival (OS) (A) and progression free survival (PFS) (B) prediction model based on *GALNT14*.

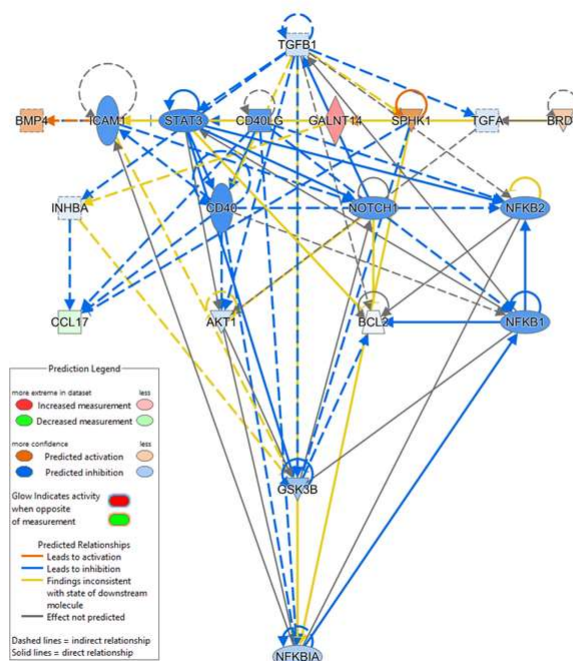

Figure S7: *GALNT14* and *CCL17*, the two proteins associated with OS with FDR 0.104 with potential function between two major signaling pathways driven by TGF and NF- $\kappa$ B. ((QIAGEN Inc., <https://www.qiagenbioinformatics.com/products/ingenuitypathway-analysis>) accessed 24 July 2023 [71]).

Table S1: Patient characteristics table and cox regression analysis of clinical covariates in the VPA cohort.

| Clinical Factors              | n (%)        | OS                         | 95% CI        | p-value | PFS          | 95% CI        | p-value |
|-------------------------------|--------------|----------------------------|---------------|---------|--------------|---------------|---------|
| Age at Diagnosis mean (SD)    | 52.34 (9.60) | Age as continuous variable |               |         |              |               |         |
| Age range                     | 31-71        | 1.035                      | 0.9884 1.085  | 0.142   | 1.029        | 0.9859 1.074  | 0.192   |
| Sex                           |              |                            |               |         |              |               |         |
| Male                          | 21 (72.4)    | 1.631                      | 0.6094 4.408  | 0.335   | 1.204        | 0.4975 2.915  | 0.68    |
| Location                      |              |                            |               |         |              |               |         |
| Periventricular               | 6 (20.7)     | 1.456                      | 0.5369 3.951  | 0.738   | 1.33         | 0.4931 3.586  | 0.573   |
| Hemisphere                    |              |                            |               |         |              |               |         |
| Left                          | 15 (51.7)    |                            |               |         |              |               |         |
| Right                         | 14 (48.3)    | 0.8341                     | 0.373 1.865   | 0.659   | 0.7087       | 0.3245 1.548  | 0.388   |
| Resection Type                |              |                            |               |         |              |               |         |
| Biospy                        | 1 (3.4)      |                            |               |         |              |               |         |
| GTR                           | 16 (55.2)    | 0.2361                     | 0.02741 2.035 | 0.189   | 0.3537       | 0.04313 2.901 | 0.333   |
| STR                           | 12 (41.4)    | 0.2224                     | 0.02538 1.949 | 0.175   | 0.2651       | 0.03119 2.253 | 0.224   |
| MGMT Status                   |              |                            |               |         |              |               |         |
| methyalted                    | 9 (31.0)     |                            |               |         |              |               |         |
| unmethyalted                  | 8 (27.6)     | 3.186                      | 1.0464 9.702  | *0.0414 | 2.688        | 0.9445 7.649  | 0.0639  |
| unknown                       | 12 (41.4)    | 2.77                       | 0.9895 7.754  | 0.0524  | 2.556        | 0.9541 6.847  | 0.062   |
| KPS                           |              |                            |               |         |              |               |         |
| Baseline 70                   |              |                            |               |         |              |               |         |
| 90                            |              | 1.271                      | 0.3793 4.33   | 0.701   | 1.037        | 0.3067 3.507  | 0.953   |
| 60-80                         | 3 (10.3)     |                            |               |         |              |               |         |
| 90                            | 12 (41.4)    |                            |               |         |              |               |         |
| 100                           | 14 (48.3)    |                            |               |         |              |               |         |
| RPA                           |              |                            |               |         |              |               |         |
| RPA 3                         | 9 (31.0)     |                            |               |         |              |               |         |
| RPA 4                         | 17 (58.6)    | 2.86                       | 1.0093 8.104  | *0.048  | 2.865        | 1.0365 7.917  | *0.0425 |
| RPA 5                         | 3 (10.3)     | 1.298                      | 0.2609 6.458  | 0.75    | 1.086        | 0.2226 5.297  | 0.9188  |
| RT volumes                    |              |                            |               |         |              |               |         |
| GTV T1                        |              |                            |               |         |              |               |         |
| GTV T1 as continuous variable |              |                            |               |         |              |               |         |
| 1.011                         |              | 0.9944 1.028               | 0.195         | 1.01    | 0.9939 1.027 | 0.221         |         |
| <20 cc                        | 11 (37.9)    |                            |               |         |              |               |         |
| 20-40 cc                      | 9 (31.0)     |                            |               |         |              |               |         |
| >40 cc                        | 9 (31.0)     |                            |               |         |              |               |         |
| GTV T2                        |              |                            |               |         |              |               |         |
| GTV T2 as continuous variable |              |                            |               |         |              |               |         |
| 1.006                         |              | 0.9981 1.015               | 0.132         | 1.008   | 0.9957 1.011 | 0.415         |         |
| <30 cc                        | 0 (0.0)      |                            |               |         |              |               |         |
| 30-50 cc                      | 8 (27.6)     |                            |               |         |              |               |         |
| 50-100 cc                     | 8 (27.6)     |                            |               |         |              |               |         |
| >100 cc                       | 13 (44.8)    |                            |               |         |              |               |         |
| Radiation Technique           |              |                            |               |         |              |               |         |
| 3D                            | 9 (31.0)     |                            |               |         |              |               |         |
| Arc                           | 0 (0.0)      |                            |               |         |              |               |         |
| IMRT                          | 20 (69.0)    | 0.7431                     | 0.3143 1.757  | 0.499   | 0.6184       | 0.2661 1.437  | 0.264   |

Table S2: Cox analysis for overall survival (OS) and progression free survival (PFS) with hazard ratio and *p*-value for VPA and no VPA patients.

| Factors             | OS      |                 |                  | PFS    |               |                 |
|---------------------|---------|-----------------|------------------|--------|---------------|-----------------|
|                     | HR      | 95% CI          | p-value          | HR     | 95% CI        | p-value         |
| Age at Diagnosis    | 1.045   | 1.019 1.071     | <b>*0.000552</b> | 1.041  | 1.016 1.065   | <b>*0.00102</b> |
| BMI                 | 1.023   | 0.9834 1.065    | 0.256            | 1.046  | 1 1.094       | <b>*0.0494</b>  |
| Sex                 |         |                 |                  |        |               |                 |
| Male                | 1.604   | 0.9378 2.744    | 0.0844           | 1.554  | 0.9229 2.617  | 0.0973          |
| KPS                 |         |                 |                  |        |               |                 |
| 70                  | 0.4597  | 0.10095 2.093   | 0.315            | 0.6111 | 0.1355 2.757  | 0.522           |
| 90                  | 0.3967  | 0.09341 1.685   | 0.210            | 0.5127 | 0.1220 2.155  | 0.362           |
| unknown             | 3.1886  | 0.59814 16.998  | 0.174            | 2.8370 | 0.5424 14.839 | 0.217           |
| RPA                 |         |                 |                  |        |               |                 |
| RPA 4               | 2.326   | 1.1627 4.652    | 0.017027         | 2.006  | 1.037 3.880   | <b>*0.03866</b> |
| RPA 5               | 1.908   | 0.8917 4.081    | 0.096007         | 2.114  | 1.005 4.448   | <b>*0.04860</b> |
| unknown             | 11.234  | 2.8870 43.716   | <b>*0.000484</b> | 6.930  | 1.861 25.806  | <b>*0.00391</b> |
| MGMT Status         |         |                 |                  |        |               |                 |
| unmethyalted        | 2.442   | 1.3320 4.479    | <b>*0.00389</b>  | 2.212  | 1.2263 3.990  | <b>*0.00835</b> |
| unknown             | 1.335   | 0.7284 2.445    | 0.35029          | 1.385  | 0.7624 2.515  | 0.28507         |
| Resection Type      |         |                 |                  |        |               |                 |
| GTR                 | 1.330   | 0.6001 2.948    | 0.482            | 0.9351 | 0.4232 2.066  | 0.868           |
| STR                 | 1.603   | 0.7467 3.443    | 0.226            | 0.9306 | 0.4311 2.009  | 0.855           |
| Radiation Technique |         |                 |                  |        |               |                 |
| Arc                 | 1.0852  | 0.5822 2.023    | 0.797            | 0.6569 | 0.3530 1.222  | 0.185           |
| IMRT                | 0.9003  | 0.5287 1.533    | 0.699            | 0.6722 | 0.3958 1.142  | 0.142           |
| GTV-T1              | 1.013   | 1.006 1.02      | <b>*0.000346</b> | 1.005  | 0.9987 1.011  | 0.127           |
| GTV-T2              | 1.006   | 1.001 1.01      | 0.0121           | 1.003  | 0.9966 0.9996 | 0.0782          |
| Infiltration        |         |                 |                  |        |               |                 |
| Periventricular     | 1.598   | 0.9896 2.58     | 0.0552           | 1.652  | 1.02 2.676    | <b>*0.0412</b>  |
| Hemisphere          |         |                 |                  |        |               |                 |
| Left                | 0.08523 | 0.010143 0.7162 | <b>*0.0234</b>   | 0.4747 | 0.06366 3.540 | 0.467           |
| Right               | 0.07018 | 0.008336 0.5909 | <b>*0.0145</b>   | 0.3207 | 0.04287 2.398 | 0.268           |
| Location            |         |                 |                  |        |               |                 |
| Location FP         | 0.8268  | 0.1927 3.548    | 0.7980           | 2.5540 | 0.5850 11.152 | 0.2124          |
| Location FT         | 1.0207  | 0.3821 2.727    | 0.9674           | 0.8522 | 0.3199 2.270  | 0.7491          |
| Location O          | 2.4527  | 0.5623 10.698   | 0.2325           | 2.3980 | 0.5508 10.439 | 0.2438          |
| Location OP         | 2.4801  | 1.0264 5.992    | <b>*0.0436</b>   | 2.8151 | 1.1566 6.852  | <b>*0.0226</b>  |
| Location P          | 0.9742  | 0.5084 1.867    | 0.9372           | 0.9557 | 0.5034 1.814  | 0.8897          |
| Location T          | 0.9462  | 0.4874 1.837    | 0.8702           | 0.7757 | 0.4074 1.477  | 0.4395          |
| Location TP         | 1.1996  | 0.4798 2.999    | 0.6971           | 1.5117 | 0.6054 3.775  | 0.3762          |
| VPA                 |         |                 |                  |        |               |                 |
| Yes                 | 0.5355  | 0.3278 0.8749   | <b>*0.0126</b>   | 0.5573 | 0.3461 0.8974 | <b>*0.0162</b>  |

Table S3: Cancer Hallmark GeneSets associated with Valproic acid (VPA) administration.

| GeneList GeneSets                          | Number of genes | KS permutation p-value | FDR   |
|--------------------------------------------|-----------------|------------------------|-------|
| HALLMARK_EPITHELIAL_MESENCHYMAL_TRANSITION | 150/200         | 0.00009                | 0.005 |
| HALLMARK_HEDGEHOG_SIGNALING                | 24/36           | 0.00031                | 0.008 |
| HALLMARK_IL6_JAK_STAT3_SIGNALING           | 74/87           | 0.00706                | 0.118 |
| HALLMARK_COAGULATION                       | 112/138         | 0.01036                | 0.130 |
| HALLMARK_NOTCH_SIGNALING                   | 19/32           | 0.01456                | 0.140 |
| HALLMARK_APICAL_JUNCTION                   | 123/200         | 0.01674                | 0.140 |
| HALLMARK_XENOBIOTIC_METABOLISM             | 123/200         | 0.02106                | 0.150 |
| HALLMARK_COMPLEMENT                        | 148/200         | 0.04952                | 0.283 |

Table S4: Results of online sample size calculation tool to calculate the minimum sample size for PFS and OS.

|     | Input Parameters         |                    |                             | Output         |                                |                                |                     |
|-----|--------------------------|--------------------|-----------------------------|----------------|--------------------------------|--------------------------------|---------------------|
|     | standardized fold change | Number of proteins | prevalence in largest group |                | Minimum sample size in class 1 | Minimum sample size in class 2 | Minimum sample size |
| PFS | 1.44                     | 7289               | 0.646                       | Tolerance=0.05 | 37                             | 21                             | 58                  |
|     |                          |                    |                             | Tolerance=0.10 | 29                             | 16                             | 45                  |
| OS  | 1.19                     | 7289               | 0.524                       | Tolerance=0.05 | 39                             | 35                             | 74                  |
|     |                          |                    |                             | Tolerance=0.10 | 30                             | 27                             | 57                  |

\*Class 1 is for the group that has the largest prevalence.

\*\*Conceptually the patients with survival time greater than a landmark time T can be considered the low risk class and those with survival less than T as the high risk class. T should be selected to approximately maximize the difference in survival distributions between the two classes and the prevalence determined accordingly.
