# Supplementary material for: Revisiting Concurrent Radiation Therapy, Temozolomide, and the Histone Deacetylase Inhibitor Valproic Acid for Patients with Glioblastoma—Proteomic Alteration and Comparison Analysis with the Standard-of-Care Chemoirradiation
Source: MDPI journal article supplement (doi:10.3390/biom13101499), 2023-10-10
Supplement: s1 [file s1 › Supplementary file S2.xlsx]

## Sheet: Sheet1
	Parametric p-value (VPA class comparison)	FDR	Geom mean of intensities in class 1	Geom mean of intensities in class 2	Fold-change	mean log2(COT/PRE)	UniqueID	Annotations	Symbol	Name	EntrezID	Accession	UGCluster	Ensembl	OS p-value	OS FDR	OS HR	PFS p-value	PFS FDR	PFS HR
70	0.0001844	0.0192	1.18	0.73	1.62	-0.00409756	3519-3	Info	CCL17	C-C motif chemokine ligand 17	6361	NM_002987	Hs.546294	ENSG00000102970	0.0026828	0.198	1.513	0.0242818	0.232	1.363
67	0.0001542	0.0168	1.04	1.34	0.78	0.186098	21767-129	Info	GALNT14	polypeptide N-acetylgalactosaminyltransferase 14	79623	NM_001253826	Hs.468058	ENSG00000158089	0.0031952	0.198	0.407	0.0037992	0.232	0.388
53	8.25e-05	0.011	0.99	0.86	1.16	-0.0876463	3364-76	Info	CTSV	cathepsin V	1515	NM_001201575	Hs.610096	ENSG00000136943	0.0087278	0.285	3.647	0.02416	0.232	3.031
61	0.0001096	0.0128	1.06	1.3	0.81	0.184366	5742-14	Info	ACP6	acid phosphatase 6, lysophosphatidic	51205	NM_001323625	Hs.562154	ENSG00000162836	0.0112362	0.285	0.408	0.007109	0.232	0.378
98	0.0005342	0.0392	1.04	1.22	0.85	0.133695	3736-60	Info	BMP6	bone morphogenetic protein 6	654	NM_001718	Hs.285671	ENSG00000153162	0.0115037	0.285	0.344	0.0271244	0.24	0.369
38	3.12e-05	0.00587	1.01	1.18	0.85	0.0893049	12077-32	Info	MSTN	myostatin	2660	NM_005259	Hs.41565	ENSG00000138379	0.0192143	0.304	0.277	0.0933217	0.339	0.424
31	1.75e-05	0.00408	0.99	1.28	0.77	0.116098	16916-19	Info	SLITRK6	SLIT and NTRK like family member 6	84189	NM_032229	Hs.525105	ENSG00000184564	0.0210822	0.304	0.494	0.193885	0.496	0.729
117	0.0008716	0.054	0.9	0.72	1.24	-0.266951	9461-2	Info	ICAM4	intercellular adhesion molecule 4 (Landsteiner-Wiener blood group)	3386	NM_001039132	Hs.706750	ENSG00000105371	0.02721	0.304	2.002	0.0392787	0.246	1.806
63	0.0001109	0.0128	0.99	1.13	0.87	0.0498537	9256-78	Info	NPTX1	neuronal pentraxin 1	4884	NM_002522	Hs.514556	ENSG00000171246	0.0290548	0.304	0.286	0.28046	0.504	0.615
13	3e-07	0.000156	1.04	1.45	0.72	0.228841	4568-17	Info	SLITRK5	SLIT and NTRK like family member 5	26050	NM_015567	Hs.591208	ENSG00000165300	0.0307893	0.304	0.542	0.0129387	0.232	0.475
28	1.41e-05	0.00367	0.99	1.17	0.85	0.0738293	24664-3	Info	EMC10	ER membrane protein complex subunit 10	284361	NM_175063	Hs.448941	ENSG00000161671	0.0350944	0.304	0.326	0.268842	0.5	0.629
54	8.28e-05	0.011	0.98	1.12	0.88	0.0379634	5703-26	Info	OLFM1	olfactomedin 1	10439	NM_001282611	Hs.522484	ENSG00000130558	0.0363835	0.304	0.311	0.229591	0.496	0.555
121	0.000913	0.055	0.93	1.24	0.75	0.0409878	5668-49	Info	AGR3	anterior gradient 3, protein disulphide isomerase family member	155465	NM_176813	Hs.100686	ENSG00000173467	0.0390023	0.304	0.644	0.036627	0.246	0.638
11	2e-07	0.000121	0.97	1.24	0.78	0.0849146	10666-7	Info	GNPTG	N-acetylglucosamine-1-phosphate transferase gamma subunit	84572	NM_032520	Hs.241575	ENSG00000090581	0.0399989	0.304	0.496	0.196781	0.496	0.687
3	< 1e-07	< 1e-07	1.08	1.75	0.62	0.361524	21172-11	Info	TLNRD1	talin rod domain containing 1	59274	NM_022566	Hs.513071	ENSG00000140406	0.0408525	0.304	0.617	0.0189285	0.232	0.592
116	0.0008398	0.0528	1.02	1.16	0.88	0.0980366	21891-31	Info	FBLN7	fibulin 7	129804	NM_001128165	Hs.437696	ENSG00000144152	0.0408888	0.304	0.399	0.0129722	0.232	0.3
48	6.11e-05	0.00928	1.01	1.15	0.88	0.0806098	5124-62	Info	ICAM5	intercellular adhesion molecule 5	7087	NM_003259	Hs.465862	ENSG00000105376	0.041704	0.304	0.323	0.0304438	0.246	0.298
9	< 1e-07	7.29e-05	1.12	1.59	0.7	0.338732	21708-149	Info	FCGRT	Fc fragment of IgG receptor and transporter	2217	NM_001136019	Hs.111903	ENSG00000104870	0.0474584	0.323	0.597	0.0143336	0.232	0.511
36	2.55e-05	0.00516	0.96	0.77	1.25	-0.166146	22534-14	Info	PPP4C	protein phosphatase 4 catalytic subunit	5531	NM_001303503	Hs.534338	ENSG00000149923	0.0495253	0.323	1.949	0.191233	0.496	1.617
101	0.0005591	0.0403	0.84	0.6	1.41	-0.419951	7885-17	Info	CFHR5	complement factor H related 5	81494	NM_030787	Hs.282594	ENSG00000134389	0.0533892	0.326	1.421	0.0368684	0.246	1.433
4	< 1e-07	< 1e-07	1.03	1.33	0.78	0.17061	12510-3	Info	STAP1	signal transducing adaptor family member 1	26228	NM_001317769	Hs.435579	ENSG00000035720	0.0565266	0.326	0.447	0.0180443	0.232	0.373
106	0.0006541	0.045	0.97	1.15	0.84	0.047622	8428-102	Info	NTM	neurotrimin	50863	NM_001048209	Hs.504352	ENSG00000182667	0.0577524	0.326	0.479	0.0223917	0.232	0.376
15	4e-07	0.000194	1.02	1.31	0.78	0.158183	7871-16	Info	TMEM132A	transmembrane protein 132A	54972	NM_017870	Hs.118552	ENSG00000006118	0.0624261	0.337	0.468	0.0602592	0.299	0.468
19	2.3e-06	0.000882	0.87	0.56	1.56	-0.419927	9384-17	Info	CAMP	cathelicidin antimicrobial peptide	820	NM_004345	Hs.51120	ENSG00000164047	0.0669781	0.346	1.436	0.368049	0.578	1.199
84	0.0003522	0.0304	1.17	0.68	1.73	-0.0516829	11360-39	Info	RRM1	ribonucleotide reductase catalytic subunit M1	6240	NM_001033	Hs.445705	ENSG00000167325	0.0751381	0.347	1.247	0.132493	0.42	1.188
113	0.0007787	0.0498	1.02	1.21	0.84	0.114817	21397-21	Info	PRTG	protogenin	283659	NM_173814	Hs.130957	ENSG00000166450	0.0804856	0.347	0.517	0.0206313	0.232	0.391
35	2.45e-05	0.0051	1	1.12	0.89	0.0559024	3630-27	Info	CADM3	cell adhesion molecule 3	57863	NM_001127173	Hs.365689	ENSG00000162706	0.0833548	0.347	0.293	0.193597	0.496	0.448
104	0.0006245	0.0438	1.34	2.01	0.67	0.627732	3803-10	Info	CST5	cystatin D	1473	NM_001900	Hs.121489	ENSG00000170367	0.0860733	0.347	0.769	0.0594823	0.299	0.747
24	6.7e-06	0.00203	0.99	0.67	1.49	-0.217878	20549-1	Info	IZUMO4	IZUMO family member 4	113177	NM_001031735	Hs.424049	ENSG00000099840	0.0877852	0.347	1.449	0.116523	0.401	1.389
93	0.0004476	0.0351	1.02	1.23	0.83	0.117927	5620-13	Info	PAM	peptidylglycine alpha-amidating monooxygenase	5066	NM_000919	Hs.369430	ENSG00000145730	0.0905643	0.347	0.55	0.139172	0.42	0.591
107	0.0006636	0.045	1.01	1.21	0.84	0.111415	9772-153	Info	NLGN2	neuroligin 2	57555	NM_020795	Hs.26229	ENSG00000169992	0.0905668	0.347	0.488	0.207057	0.496	0.593
17	8e-07	0.000343	1.06	1.28	0.83	0.181524	18380-78	Info	ALB	albumin	213	NM_000477	Hs.418167	ENSG00000163631	0.0931564	0.347	0.45	0.0126665	0.232	0.298
95	0.0004757	0.0365	0.97	1.16	0.84	0.0497927	18935-14	Info	TLR5	toll like receptor 5	7100	NM_003268	Hs.604542	ENSG00000187554	0.0968578	0.347	0.537	0.653055	0.786	0.852
60	0.000109	0.0128	0.92	0.62	1.49	-0.3175	15481-45	Info	CAMP	cathelicidin antimicrobial peptide	820	NM_004345	Hs.51120	ENSG00000164047	0.0975512	0.347	1.38	0.646522	0.786	1.091
96	0.0004951	0.0376	0.97	1.23	0.79	0.0725976	2765-4	Info	GDF11	growth differentiation factor 11	10220	NM_005811	Hs.600883	ENSG00000135414	0.099915	0.347	0.615	0.287684	0.51	0.741
30	1.62e-05	0.00394	1.03	1.38	0.74	0.187902	21676-17	Info	SERPINB2	serpin family B member 2	5055	NM_001143818	Hs.594481	ENSG00000197632	0.103212	0.347	0.658	0.043108	0.255	0.541
23	5.4e-06	0.00171	0.95	1.36	0.7	0.103244	17454-15	Info	EGFL6	EGF like domain multiple 6	25975	NM_001167890	Hs.12844	ENSG00000198759	0.103517	0.347	0.68	0.0336106	0.246	0.617
1	< 1e-07	< 1e-07	1.03	0.58	1.78	-0.256634	5242-37	Info	MAP2K4	mitogen-activated protein kinase kinase 4	6416	NM_001281435	Hs.514681	ENSG00000065559	0.108836	0.355	1.39	0.0835892	0.314	1.425
57	8.72e-05	0.0112	0.95	1.17	0.82	0.034622	3616-3	Info	GNS	glucosamine (N-acetyl)-6-sulfatase	2799	NM_002076	Hs.334534	ENSG00000135677	0.113885	0.359	0.612	0.0133445	0.232	0.409
40	3.89e-05	0.00702	1.13	1.59	0.71	0.354768	21967-20	Info	HSD11B1	hydroxysteroid 11-beta dehydrogenase 1	3290	NM_001206741	Hs.195040	ENSG00000117594	0.116717	0.359	0.701	0.142273	0.42	0.723
78	0.0002722	0.0254	1.03	1.23	0.83	0.130622	8052-115	Info	NLGN1	neuroligin 1	22871	NM_014932	Hs.478289	ENSG00000169760	0.12087	0.359	0.574	0.141731	0.42	0.594
55	8.31e-05	0.011	1	1.45	0.69	0.191207	8374-5	Info	NGFR	nerve growth factor receptor	4804	NM_002507	Hs.415768	ENSG00000064300	0.122784	0.359	0.729	0.420802	0.606	0.854
41	3.95e-05	0.00702	1.08	1.34	0.8	0.218732	7156-2	Info	FUT10	fucosyltransferase 10	84750	NM_032664	Hs.458713	ENSG00000172728	0.124484	0.359	0.579	0.0562281	0.299	0.492
29	1.52e-05	0.00382	1.01	1.14	0.89	0.0751341	9981-18	Info	FAM234B	family with sequence similarity 234 member B	57613	NM_020853	Hs.132660	ENSG00000084444	0.127881	0.36	0.387	0.179956	0.496	0.424
50	7.15e-05	0.0102	1.08	1.32	0.82	0.211146	3607-71	Info	DKK3	dickkopf WNT signaling pathway inhibitor 3	27122	NM_001018057	Hs.292156	ENSG00000050165	0.132112	0.364	0.573	0.272114	0.5	0.692
110	0.0007231	0.0479	1.04	1.17	0.89	0.122085	21430-4	Info	PLA2G4A	phospholipase A2 group IVA	5321	NM_001311193	Hs.497200	ENSG00000116711	0.141872	0.382	0.415	0.0817642	0.314	0.345
49	6.57e-05	0.00977	1.1	1.37	0.8	0.247829	9261-14	Info	EPHB6	EPH receptor B6	2051	NM_001280794	Hs.380089	ENSG00000106123	0.150018	0.396	0.62	0.0801109	0.314	0.552
37	2.81e-05	0.00554	0.92	0.76	1.21	-0.21378	3316-58	Info	SERPIND1	serpin family D member 1	3053	NM_000185	Hs.474270	ENSG00000099937	0.156321	0.404	1.845	0.267377	0.5	1.591
114	0.000779	0.0498	0.96	1.23	0.78	0.0693293	11237-49	Info	PCOLCE	procollagen C-endopeptidase enhancer	5118	NM_002593	Hs.202097	ENSG00000106333	0.177295	0.449	0.745	0.239405	0.5	0.781
42	4.05e-05	0.00703	1.02	0.91	1.12	-0.0260488	4152-58	Info	KLKB1	kallikrein B1	3818	NM_000892	Hs.237642	ENSG00000164344	0.187696	0.465	2.194	0.264458	0.5	2.01
80	0.0003144	0.0286	0.92	0.69	1.33	-0.267341	16055-3	Info	CFHR5	complement factor H related 5	81494	NM_030787	Hs.282594	ENSG00000134389	0.191675	0.466	1.347	0.081841	0.314	1.457
81	0.0003281	0.0295	0.99	0.9	1.1	-0.0580122	2775-54	Info	IL17F	interleukin 17F	112744	NM_052872	Hs.272295	ENSG00000112116	0.206238	0.492	0.438	0.401349	0.602	0.556
88	0.0003665	0.0304	1.03	1.22	0.85	0.131293	5452-71	Info	ASGR1	asialoglycoprotein receptor 1	432	NM_001197216	Hs.12056	ENSG00000141505	0.216532	0.502	0.602	0.452625	0.627	0.74
33	2.06e-05	0.00455	0.97	1.48	0.65	0.172683	7655-11	Info	NPPB	natriuretic peptide B	4879	NM_002521	Hs.219140	ENSG00000120937	0.218713	0.502	0.795	0.241953	0.5	0.805
124	0.0009964	0.0586	1.1	1.34	0.82	0.238012	15530-33	Info	EPHB4	EPH receptor B4	2050	NM_004444	Hs.437008	ENSG00000196411	0.232671	0.517	0.669	0.125993	0.42	0.585
51	7.16e-05	0.0102	1.39	2.13	0.65	0.691476	5034-79	Info	PRSS2	serine protease 2	5645	NM_001303414	Hs.449281	ENSG00000275896	0.249011	0.517	0.822	0.402982	0.602	0.864
122	0.0009425	0.0563	1.61	2.29	0.7	0.867317	4374-45	Info	GDF15	growth differentiation factor 15	9518	NM_004864	Hs.616962	ENSG00000130513	0.25022	0.517	0.813	0.445948	0.627	0.876
72	0.0002058	0.0208	0.92	0.72	1.28	-0.246878	3666-17	Info	CFHR5	complement factor H related 5	81494	NM_030787	Hs.282594	ENSG00000134389	0.250499	0.517	1.361	0.0833985	0.314	1.557
90	0.0003757	0.0304	0.97	0.85	1.14	-0.106683	9317-4	Info	LRRC25	leucine rich repeat containing 25	126364	NM_145256	Hs.332156	ENSG00000175489	0.251418	0.517	1.908	0.0957432	0.339	2.402
102	0.0005647	0.0404	1	0.88	1.15	-0.0630976	19560-23	Info	PLXNA4	plexin A4	91584	NM_001105543	Hs.511454	ENSG00000221866	0.255478	0.517	1.85	0.328109	0.54	1.681
59	0.0001015	0.0125	0.82	0.53	1.55	-0.509085	2890-59	Info	CCL28	C-C motif chemokine ligand 28	56477	NM_001301873	Hs.656904	ENSG00000151882	0.256011	0.517	1.22	0.228375	0.496	1.238
100	0.0005376	0.0392	1	1.56	0.64	0.224659	4891-50	Info	GCG	glucagon	2641	NM_002054	Hs.516494	ENSG00000115263	0.259407	0.517	0.851	0.58432	0.747	0.928
97	0.0005215	0.0392	0.97	1.2	0.81	0.0690122	24474-12	Info	TTC9	tetratricopeptide repeat domain 9	23508	NM_015351	Hs.79170	ENSG00000133985	0.262877	0.517	0.679	0.0805556	0.314	0.548
66	0.0001327	0.0147	1.05	1.23	0.86	0.147659	5744-12	Info	C1orf56	chromosome 1 open reading frame 56	54964	NM_017860	Hs.549171	ENSG00000143443	0.270713	0.521	0.605	0.229742	0.496	0.583
71	0.0001879	0.0193	1.04	1.25	0.83	0.15072	21492-19	Info	CLUL1	clusterin like 1	27098	NM_001289036	Hs.732341	ENSG00000079101	0.274774	0.521	0.642	0.0666287	0.306	0.468
119	0.0008813	0.054	1.17	0.94	1.24	0.112744	2516-57	Info	CCL21	C-C motif chemokine ligand 21	6366	NM_002989	Hs.57907	ENSG00000137077	0.277441	0.521	1.37	0.324899	0.54	1.33
12	2e-07	0.000121	1.04	1.24	0.84	0.141012	5078-82	Info	EPHB6	EPH receptor B6	2051	NM_001280794	Hs.380089	ENSG00000106123	0.287952	0.521	0.569	0.479267	0.646	0.7
47	5.79e-05	0.00898	1.05	0.76	1.38	-0.0920122	2665-26	Info	TNFRSF17	TNF receptor superfamily member 17	608	NM_001192	Hs.2556	ENSG00000048462	0.289529	0.521	1.262	0.202539	0.496	1.339
77	0.000265	0.0251	1.04	0.94	1.1	0.00818293	9197-4	Info	LGALS9	galectin 9	3965	NM_001330163	Hs.81337	ENSG00000168961	0.289653	0.521	2.153	0.330971	0.54	1.993
123	0.0009515	0.0564	1.04	1.23	0.85	0.145171	5124-69	Info	ICAM5	intercellular adhesion molecule 5	7087	NM_003259	Hs.465862	ENSG00000105376	0.295133	0.523	0.671	0.21813	0.496	0.638
99	0.0005353	0.0392	0.93	1.2	0.78	0.0293293	6379-62	Info	ADAMTSL2	ADAMTS like 2	9719	NM_001145320	Hs.522543	ENSG00000197859	0.300466	0.523	0.807	0.81179	0.899	0.954
16	5e-07	0.000228	1.03	0.73	1.41	-0.133573	3169-70	Info	IDUA	iduronidase, alpha-L-	3425	NM_000203	Hs.89560	ENSG00000127415	0.306577	0.523	1.289	0.329506	0.54	1.257
89	0.0003734	0.0304	1.18	0.87	1.36	0.0789512	3470-1	Info	SELE	selectin E	6401	NM_000450	Hs.82848	ENSG00000007908	0.308151	0.523	1.24	0.208413	0.496	1.309
64	0.0001136	0.0129	1	1.15	0.87	0.0741341	9484-75	Info	DSG2	desmoglein 2	1829	NM_001943	Hs.412597	ENSG00000046604	0.340707	0.571	0.588	0.373022	0.578	0.639
109	0.0007162	0.0479	1.01	0.85	1.19	-0.0705732	6431-68	Info	PCYOX1	prenylcysteine oxidase 1	51449	NM_016297	Hs.567502	ENSG00000116005	0.356461	0.589	1.389	0.595326	0.753	1.189
43	4.19e-05	0.0071	1.12	1.51	0.74	0.313951	5028-59	Info	CD163	CD163 molecule	9332	NM_004244	Hs.504641	ENSG00000177575	0.369161	0.602	0.804	0.394352	0.602	0.808
118	0.0008751	0.054	0.95	1.2	0.79	0.0458049	8969-49	Info	CD14	CD14 molecule	929	NM_000591	Hs.163867	ENSG00000170458	0.377966	0.606	0.758	0.864884	0.925	0.958
46	5.42e-05	0.00859	1.11	1.52	0.73	0.307171	19760-26	Info	CPA1	carboxypeptidase A1	1357	NM_001868	Hs.2879	ENSG00000091704	0.38617	0.606	0.804	0.738872	0.848	0.92
69	0.000168	0.0177	0.99	0.87	1.14	-0.0799024	6315-58	Info	PLBD1	phospholipase B domain containing 1	79887	NM_024829	Hs.131933	ENSG00000121316	0.392196	0.606	1.678	0.29231	0.511	1.82
14	3e-07	0.000156	1.04	0.8	1.3	-0.0759024	2960-66	Info	CFP	complement factor properdin	5199	NM_001145252	Hs.53155	ENSG00000126759	0.392573	0.606	1.324	0.250774	0.5	1.46
27	1.34e-05	0.00362	0.99	1.22	0.81	0.0971707	8245-27	Info	ICAM5	intercellular adhesion molecule 5	7087	NM_003259	Hs.465862	ENSG00000105376	0.398492	0.606	0.678	0.904096	0.942	0.955
7	< 1e-07	< 1e-07	0.98	1.22	0.8	0.078061	13112-179	Info	FSTL1	follistatin like 1	11167	NM_007085	Hs.269512	ENSG00000163430	0.405807	0.606	1.431	0.467024	0.636	1.364
52	7.98e-05	0.011	0.98	1.14	0.86	0.0462683	5483-1	Info	RGMA	repulsive guidance molecule BMP co-receptor a	56963	NM_001166283	Hs.271277	ENSG00000182175	0.408004	0.606	0.669	0.171745	0.495	0.529
79	0.0002948	0.0272	1.11	0.95	1.16	0.0675854	20241-9	Info	SNAP23	synaptosome associated protein 23	8773	NM_003825	Hs.511149	ENSG00000092531	0.414795	0.606	1.419	0.624831	0.769	1.218
82	0.0003444	0.0304	1	1.16	0.86	0.0791707	21384-2	Info	FUCA1	alpha-L-fucosidase 1	2517	NM_000147	Hs.370858	ENSG00000179163	0.415579	0.606	0.694	0.367833	0.578	0.666
105	0.0006308	0.0438	1.2	0.91	1.32	0.118402	23371-5	Info	NIF3L1	NGG1 interacting factor 3 like 1	60491	NM_001136039	Hs.145284	ENSG00000196290	0.437562	0.62	1.188	0.128564	0.42	1.418
85	0.0003579	0.0304	0.98	1.1	0.89	0.0283171	9321-400	Info	NMB	neuromedin B	4828	NM_021077	Hs.386470	ENSG00000197696	0.437764	0.62	0.652	0.231953	0.496	0.512
65	0.0001152	0.0129	0.98	1.31	0.75	0.116695	7223-60	Info	S100A13	S100 calcium binding protein A13	6284	NM_001024210	Hs.516505	ENSG00000189171	0.440081	0.62	0.816	0.267899	0.5	0.755
68	0.0001604	0.0172	1.05	0.77	1.37	-0.0894512	14086-11	Info	SMPDL3A	sphingomyelin phosphodiesterase acid like 3A	10924	NM_001286138	Hs.486357	ENSG00000172594	0.456679	0.63	1.184	0.425172	0.606	1.183
115	0.0008007	0.0508	1.05	1.2	0.88	0.13789	20517-1	Info	DSG2	desmoglein 2	1829	NM_001943	Hs.412597	ENSG00000046604	0.459753	0.63	1.48	0.925249	0.948	1.048
8	< 1e-07	< 1e-07	1.05	1.23	0.85	0.150902	15391-114	Info	GAS6	growth arrest specific 6	2621	NM_000820	Hs.646346	ENSG00000183087	0.462635	0.63	0.662	0.674451	0.798	0.796
39	3.14e-05	0.00587	0.99	1.19	0.83	0.0766707	14101-2	Info	CNTFR	ciliary neurotrophic factor receptor	1271	NM_001207011	Hs.129966	ENSG00000122756	0.470049	0.634	0.72	0.626503	0.769	0.81
18	1.4e-06	0.000567	1.02	1.24	0.83	0.128659	9232-1	Info	ROBO4	roundabout guidance receptor 4	54538	NM_001301088	Hs.524121	ENSG00000154133	0.503789	0.65	0.742	0.512065	0.67	0.742
91	0.0003814	0.0305	0.98	0.82	1.2	-0.122488	7178-59	Info	DEPP1	DEPP1, autophagy regulator	11067	NM_007021	Hs.93675	ENSG00000165507	0.509173	0.65	1.298	0.23166	0.496	1.607
2	< 1e-07	< 1e-07	0.99	1.31	0.75	0.130634	9557-5	Info	MANSC1	MANSC domain containing 1	54682	NM_018050	Hs.591145	ENSG00000111261	0.513304	0.65	0.774	0.265375	0.5	0.656
20	2.7e-06	0.000972	1.13	1.47	0.77	0.308573	20087-3	Info	SELENOF	selenoprotein F	9403	NM_004261	Hs.362728	ENSG00000183291	0.516502	0.65	0.824	0.363354	0.578	0.767
10	< 1e-07	7.29e-05	1.04	1.32	0.79	0.180939	20585-5	Info	CD300LG	CD300 molecule like family member g	146894	NM_001168322	Hs.147313	ENSG00000161649	0.51848	0.65	0.783	0.274069	0.5	0.664
25	7.5e-06	0.00219	1.03	0.65	1.59	-0.195451	3173-49	Info	NAAA	N-acylethanolamine acid amidase	27163	NM_001042402	Hs.437365	ENSG00000138744	0.518959	0.65	1.117	0.495078	0.66	1.121
111	0.000744	0.0489	1	0.8	1.25	-0.109463	9002-36	Info	SERPINA11	serpin family A member 11	256394	NM_001080451	Hs.145890	ENSG00000186910	0.519127	0.65	1.199	0.605279	0.758	1.151
75	0.0002322	0.0224	0.95	0.81	1.17	-0.152793	14237-1	Info	HSPA1A	heat shock protein family A (Hsp70) member 1A	3303	NM_005345	Hs.274402	ENSG00000204389	0.526219	0.653	1.368	0.45544	0.627	1.397
62	0.0001102	0.0128	0.98	1.2	0.82	0.076061	20570-18	Info	VSTM1	V-set and transmembrane domain containing 1	284415	NM_001288791	Hs.444431	ENSG00000189068	0.591017	0.717	0.836	0.0530108	0.299	0.483
45	5.33e-05	0.00859	1.02	1.19	0.86	0.107146	20586-18	Info	CNTN3	contactin 3	5067	NM_020872	Hs.12723	ENSG00000113805	0.591159	0.717	0.758	0.872853	0.925	0.924
21	2.8e-06	0.000972	1.02	1.24	0.82	0.124646	15620-4	Info	NLGN1	neuroligin 1	22871	NM_014932	Hs.478289	ENSG00000169760	0.595896	0.717	0.8	0.513216	0.67	0.75
73	0.0002121	0.0212	0.99	1.2	0.83	0.0810732	6217-23	Info	QSOX1	quiescin sulfhydryl oxidase 1	5768	NM_001004128	Hs.744925	ENSG00000116260	0.603799	0.72	0.853	0.675511	0.798	0.893
26	1.16e-05	0.00325	1.07	1.39	0.77	0.229085	3206-4	Info	LYVE1	lymphatic vessel endothelial hyaluronan receptor 1	10894	NM_006691	Hs.655332	ENSG00000133800	0.6258	0.739	0.86	0.425186	0.606	0.775
56	8.51e-05	0.0111	0.98	0.83	1.17	-0.114	21724-22	Info	GALNS	galactosamine (N-acetyl)-6-sulfatase	2588	NM_000512	Hs.271383	ENSG00000141012	0.647053	0.757	1.218	0.424137	0.606	1.384
120	0.0009029	0.0548	1.05	0.93	1.13	0.0124024	21286-29	Info	RPL11	ribosomal protein L11	6135	NM_000975	Hs.719951	ENSG00000142676	0.655549	0.76	0.787	0.776865	0.868	1.187
22	4.6e-06	0.00152	0.99	1.21	0.82	0.0919634	9313-27	Info	CBLN1	cerebellin 1 precursor	869	NM_004352	Hs.458423	ENSG00000102924	0.681685	0.783	0.827	0.5227	0.675	0.753
6	< 1e-07	< 1e-07	0.97	1.63	0.59	0.216549	18873-8	Info	CEACAM8	carcinoembryonic antigen related cell adhesion molecule 8	1088	NM_001816	Hs.41	ENSG00000124469	0.702786	0.799	0.939	0.0397169	0.246	0.677
108	0.0006668	0.045	1.17	0.9	1.3	0.0955122	9118-7	Info	PSD2	pleckstrin and Sec7 domain containing 2	84249	NM_032289	Hs.21963	ENSG00000146005	0.739668	0.834	1.11	0.729913	0.848	0.918
5	< 1e-07	< 1e-07	0.96	0.6	1.6	-0.302659	3367-8	Info	FETUB	fetuin B	26998	NM_001308077	Hs.81073	ENSG00000090512	0.751187	0.839	1.066	0.227939	0.496	1.292
58	9.18e-05	0.0115	0.94	1.29	0.73	0.0759756	14133-93	Info	IL1R2	interleukin 1 receptor type 2	7850	NM_001261419	Hs.25333	ENSG00000115590	0.768851	0.842	1.074	0.973424	0.973	0.992
92	0.0004335	0.0343	0.87	1.12	0.77	-0.0720976	3554-24	Info	ADIPOQ	adiponectin, C1Q and collagen domain containing	9370	NM_001177800	Hs.80485	ENSG00000181092	0.769363	0.842	0.929	0.298163	0.514	0.782
76	0.0002331	0.0224	1.02	1.24	0.82	0.122402	10970-3	Info	ART3	ADP-ribosyltransferase 3	419	NM_001130016	Hs.24976	ENSG00000156219	0.775454	0.842	0.907	0.844918	0.919	0.937
32	1.79e-05	0.00408	0.96	1.08	0.89	-0.00221951	8024-64	Info	TPST2	tyrosylprotein sulfotransferase 2	8459	NM_001008566	Hs.632768	ENSG00000128294	0.780668	0.842	0.831	0.951111	0.967	0.96
34	2.23e-05	0.00478	0.99	1.19	0.84	0.0788537	11232-46	Info	TCN1	transcobalamin 1	6947	NM_001062	Hs.2012	ENSG00000134827	0.795549	0.85	0.894	0.066228	0.306	0.45
94	0.0004721	0.0365	1.02	1.23	0.83	0.126317	7970-315	Info	ART3	ADP-ribosyltransferase 3	419	NM_001130016	Hs.24976	ENSG00000156219	0.810956	0.859	0.921	0.767402	0.865	0.905
112	0.0007614	0.0496	1	1.12	0.9	0.055939	6556-5	Info	ENPP5	ectonucleotide pyrophosphatase/phosphodiesterase 5 (putative)	59084	NM_001290072	Hs.35198	ENSG00000112796	0.825617	0.868	1.162	0.863065	0.925	1.112
83	0.0003514	0.0304	1.1	0.86	1.27	0.00992683	15452-5	Info	NT5E	5'-nucleotidase ecto	4907	NM_001204813	Hs.153952	ENSG00000135318	0.833322	0.868	1.058	0.737946	0.848	1.095
86	0.000363	0.0304	1.1	1.36	0.81	0.245695	13123-3	Info	FLRT3	fibronectin leucine rich transmembrane protein 3	23767	NM_013281	Hs.41296	ENSG00000125848	0.860135	0.889	0.949	0.895379	0.941	0.962
103	0.0006047	0.0428	0.99	0.83	1.19	-0.108244	8780-2	Info	PCDH10	protocadherin 10	57575	NM_020815	Hs.192859	ENSG00000138650	0.899677	0.922	0.952	0.823321	0.903	1.093
87	0.0003647	0.0304	0.97	1.28	0.75	0.0951829	5542-22	Info	NRP1	neuropilin 1	8829	NM_001024628	Hs.131704	ENSG00000099250	0.960975	0.969	1.013	0.962329	0.97	0.989
44	4.51e-05	0.00747	1	1.13	0.88	0.0624268	6927-7	Info	NDST1	N-deacetylase and N-sulfotransferase 1	3340	NM_001301063	Hs.222055	ENSG00000070614	0.96693	0.969	0.974	0.753063	0.857	0.814
74	0.0002317	0.0224	1.06	1.33	0.79	0.197024	19361-78	Info	MATN3	matrilin 3	4148	NM_002381	Hs.656199	ENSG00000132031	0.969296	0.969	0.988	0.920225	0.948	0.97
