# Supplementary material for: Revisiting Concurrent Radiation Therapy, Temozolomide, and the Histone Deacetylase Inhibitor Valproic Acid for Patients with Glioblastoma—Proteomic Alteration and Comparison Analysis with the Standard-of-Care Chemoirradiation
Source: MDPI journal article supplement (doi:10.3390/biom13101499), 2023-10-10
Supplement: s1 [file s1 › Supplementary file S3.xlsx]

## Sheet: full list for interaction_VPA
Protein	pPFS	padjPFS	pOS	padjOS			PFS p<0.05	OS p<0.05
PLCD3	0.000462689	0.998088	0.00191736	0.73847			212	480
TGM4	0.00108752	0.998088	0.0112063	0.73847			Intersection
CYREN	0.00122544	0.998088	0.00190529	0.73847			112
ITPKC	0.00183748	0.998088	0.061179	0.743579
VARS1	0.0022753	0.998088	0.000803275	0.73847
HPCAL1	0.00237046	0.998088	0.0662763	0.744954
KIR2DL4	0.00321504	0.998088	0.00406087	0.73847
LRRC52	0.00383434	0.998088	0.0779831	0.749477
COA4	0.00456342	0.998088	0.264793	0.857524
IL17RD	0.00466515	0.998088	0.158218	0.807645
CPLX1	0.00497311	0.998088	0.079775	0.750258
KNG1	0.00497374	0.998088	0.00512215	0.73847
ST8SIA2	0.00526315	0.998088	0.187922	0.833813
HPX	0.00536055	0.998088	0.00230838	0.73847
ITIH2	0.00551689	0.998088	0.00257786	0.73847
TNR	0.00559823	0.998088	0.00160296	0.73847
PCDH12	0.00586952	0.998088	0.0394213	0.73847
COPE	0.00613315	0.998088	0.0276823	0.73847
LGALS7	0.00621849	0.998088	0.110063	0.782684
SEMA3B	0.00641389	0.998088	0.0171576	0.73847
DPYSL2	0.00689174	0.998088	0.0446886	0.73847
NCF2	0.00791513	0.998088	0.0242323	0.73847
ETS2	0.00831629	0.998088	0.00405207	0.73847
SERPINA3	0.00847472	0.998088	0.00337805	0.73847
SKP1	0.00851264	0.998088	8.04422e-05	0.586343
FNTA	0.0085488	0.998088	0.023696	0.73847
IGSF11	0.00893169	0.998088	0.0992753	0.769043
STAB2	0.00894159	0.998088	0.00412161	0.73847
DEFB127	0.00965536	0.998088	0.0197191	0.73847
AZIN1	0.00994638	0.998088	0.00333283	0.73847
RRBP1	0.0104142	0.998088	0.00812903	0.73847
CISD2	0.0110218	0.998088	0.00725994	0.73847
MUC1	0.0111382	0.998088	0.030057	0.73847
WIF1	0.0114493	0.998088	0.0174452	0.73847
FRZB	0.0118502	0.998088	0.0261994	0.73847
WIF1	0.0120181	0.998088	0.077312	0.749477
WFIKKN2	0.0122815	0.998088	0.0727079	0.745109
HTATIP2	0.0123013	0.998088	0.0436929	0.73847
FGA	0.0126701	0.998088	0.0304018	0.73847
SH2B3	0.0128131	0.998088	0.731764	0.947613
ADGRE2	0.0133155	0.998088	0.020393	0.73847
DDX46	0.0133994	0.998088	0.0230741	0.73847
HAVCR2	0.0136924	0.998088	0.262735	0.857524
MSTN	0.0138281	0.998088	0.0411266	0.73847
NUDT2	0.0144323	0.998088	0.0660464	0.744954
LDOC1	0.015222	0.998088	0.216163	0.843026
TF	0.0154894	0.998088	0.00340354	0.73847
TNFRSF13B	0.0157339	0.998088	0.0201696	0.73847
IDS	0.015803	0.998088	0.00362459	0.73847
MED28	0.0158973	0.998088	0.000774521	0.73847
APBB1	0.0160771	0.998088	0.0296821	0.73847
RAB3D	0.0162038	0.998088	0.0892419	0.759078
CEMIP2	0.0162979	0.998088	0.272004	0.859875
IL22	0.0166881	0.998088	0.0566094	0.73847
PLCXD3	0.0167862	0.998088	0.0142091	0.73847
ITCH	0.0170037	0.998088	0.0304945	0.73847
LGALS2	0.0174556	0.998088	0.226581	0.84427
CHID1	0.0178496	0.998088	0.0871388	0.759078
CAPN1	0.0181223	0.998088	0.232665	0.849045
PNPLA2	0.0181476	0.998088	0.00993582	0.73847
HPX	0.0181513	0.998088	0.0126547	0.73847
JAKMIP3	0.0186608	0.998088	0.203877	0.838932
CTNNA2	0.0186832	0.998088	0.0108045	0.73847
F11	0.0187599	0.998088	0.19761	0.837917
NTN1	0.0189383	0.998088	0.0240709	0.73847
SPRN	0.0192812	0.998088	0.11087	0.782808
ADH1A	0.0193802	0.998088	0.0304901	0.73847
UBE2F	0.0194261	0.998088	0.0387869	0.73847
HS3ST3A1	0.0197777	0.998088	0.00296287	0.73847
CFHR1	0.0200932	0.998088	0.087706	0.759078
MATN3	0.0201222	0.998088	0.00932416	0.73847
SELP	0.0203004	0.998088	0.00832919	0.73847
TBX5	0.0204553	0.998088	0.0413013	0.73847
SDCBP	0.0204713	0.998088	0.0366093	0.73847
TNRC6B	0.020476	0.998088	0.919919	0.987279
BID	0.0205196	0.998088	0.0449504	0.73847
RASSF2	0.0209087	0.998088	0.258265	0.854788
NDRG3	0.0212018	0.998088	0.00527473	0.73847
ARFIP2	0.0212232	0.998088	0.0579967	0.739709
DSCAM	0.0212709	0.998088	0.0535168	0.73847
DLX3	0.0215732	0.998088	0.38463	0.875038
IL20	0.0223284	0.998088	0.185566	0.832862
FGF8	0.0230056	0.998088	0.0823441	0.750258
SPARC	0.0231007	0.998088	0.0241929	0.73847
VPS53	0.023184	0.998088	0.0118992	0.73847
FAHD1	0.0244466	0.998088	0.030643	0.73847
TNFSF8	0.0246887	0.998088	0.130326	0.793862
PDGFD	0.0248831	0.998088	0.0950225	0.764481
SERPINE2	0.0251897	0.998088	0.0553136	0.73847
JAG2	0.0251918	0.998088	0.119874	0.790179
PRKCD	0.0252089	0.998088	0.0027628	0.73847
ARF6	0.0252899	0.998088	0.0294459	0.73847
S100A16	0.0254015	0.998088	0.206479	0.838932
VIM	0.0255613	0.998088	0.0869315	0.759078
SBSN	0.025727	0.998088	0.323813	0.864497
AZU1	0.0260321	0.998088	0.270749	0.859875
C3	0.0261765	0.998088	0.00713776	0.73847
CKAP4	0.0262657	0.998088	0.0729842	0.745109
TPM1	0.0262959	0.998088	0.0787691	0.750258
CLEC1A	0.0267019	0.998088	0.0519569	0.73847
ANKRD27	0.0270778	0.998088	0.0331164	0.73847
PIM2	0.0271764	0.998088	0.114691	0.786952
HAT1	0.0272414	0.998088	0.215814	0.842815
POLE3	0.0273061	0.998088	0.00507971	0.73847
INHBC	0.0274534	0.998088	0.0132784	0.73847
FGF2	0.0275614	0.998088	0.00943684	0.73847
HPD	0.0277156	0.998088	0.59604	0.921153
GLUD1	0.0277193	0.998088	0.458626	0.895989
PRDM1	0.0277925	0.998088	0.0254969	0.73847
HRG	0.0279516	0.998088	0.303101	0.859875
FAM204A	0.0287163	0.998088	0.0036903	0.73847
GPD1	0.0288374	0.998088	0.186328	0.833497
CDSN	0.0288732	0.998088	0.00349412	0.73847
MRPL32	0.0289021	0.998088	0.00358416	0.73847
SF3B6	0.0293137	0.998088	0.0316195	0.73847
EYS	0.0299359	0.998088	0.0223499	0.73847
SORCS2	0.0305039	0.998088	0.00326044	0.73847
TST	0.0305542	0.998088	0.231758	0.848644
TK1	0.03076	0.998088	0.0194737	0.73847
CRLF2	0.0309994	0.998088	0.00834173	0.73847
USH1C	0.0314534	0.998088	0.016636	0.73847
RAET1L	0.0315599	0.998088	0.29587	0.859875
SLC6A16	0.0322509	0.998088	0.00870635	0.73847
INPP5F	0.032407	0.998088	0.199788	0.838932
DEFB128	0.032453	0.998088	0.0172599	0.73847
KPNA1	0.0328587	0.998088	0.018551	0.73847
DEFB135	0.0333607	0.998088	0.0345617	0.73847
CDH23	0.0335784	0.998088	0.11094	0.782808
PRPS1	0.0336697	0.998088	0.0813958	0.750258
PRL	0.0336925	0.998088	0.0500639	0.73847
CD80	0.0337431	0.998088	0.00790723	0.73847
NHP2	0.0343507	0.998088	0.0373147	0.73847
CKMT1A	0.0344205	0.998088	0.100474	0.770899
MUCL1	0.0345163	0.998088	0.145294	0.80253
YWHAG	0.0350012	0.998088	0.383033	0.874116
ANGPT1	0.0353778	0.998088	0.0372509	0.73847
LRRN1	0.0355062	0.998088	0.0848647	0.758988
HTR7	0.0356313	0.998088	0.139121	0.795734
INHA	0.035639	0.998088	0.0573842	0.73847
DPPA4	0.0357346	0.998088	0.0628497	0.744954
RPS6KB2	0.0359166	0.998088	0.224858	0.84427
MSLN	0.0359539	0.998088	0.0877251	0.759078
MENT	0.0365603	0.998088	0.0105582	0.73847
LILRB3	0.0366081	0.998088	0.168136	0.821409
CRK	0.0366373	0.998088	0.301534	0.859875
APOC1	0.0368272	0.998088	0.0373464	0.73847
SDHAF2	0.036927	0.998088	0.0392995	0.73847
IL12RB2	0.0371133	0.998088	0.0417874	0.73847
CNTFR	0.0372373	0.998088	0.145957	0.80253
TYRO3	0.0373422	0.998088	0.313218	0.861624
SGK1	0.0373724	0.998088	0.0152036	0.73847
SEPTIN1	0.0373793	0.998088	0.0122753	0.73847
JAM2	0.0381036	0.998088	0.0777294	0.749477
ANXA7	0.0381197	0.998088	0.0180729	0.73847
BOLA1	0.0381452	0.998088	0.306941	0.859875
ST6GALNAC5	0.0386104	0.998088	0.120322	0.790179
TMEM190	0.0386597	0.998088	0.023381	0.73847
PRRG1	0.0387259	0.998088	0.0447362	0.73847
PRKACA	0.0389042	0.998088	0.0755893	0.749477
NUMB	0.0393592	0.998088	0.0688958	0.744954
EFNA3	0.039405	0.998088	0.244607	0.849901
PIWIL1	0.0394723	0.998088	0.00664146	0.73847
WFIKKN2	0.0395014	0.998088	0.0475539	0.73847
CBS	0.0398025	0.998088	0.313242	0.861624
LCE3C	0.0398362	0.998088	0.0603583	0.743579
TBPL1	0.0403139	0.998088	0.120691	0.790179
MGAT3	0.0403492	0.998088	0.110711	0.782808
EIF4H	0.0404772	0.998088	0.0488021	0.73847
TCEAL7	0.0404905	0.998088	0.601737	0.921323
NSMCE1	0.0409999	0.998088	0.404669	0.882126
EPHB1	0.0414862	0.998088	0.212351	0.838932
DNM2	0.0418296	0.998088	0.187599	0.833813
GSTK1	0.0418442	0.998088	0.020659	0.73847
DESI1	0.041882	0.998088	0.0793102	0.750258
DRG1	0.0419735	0.998088	0.0257986	0.73847
HOPX	0.0425223	0.998088	0.037705	0.73847
MTRF1L	0.042704	0.998088	0.0629807	0.744954
SEPTIN10	0.0428154	0.998088	0.071379	0.744954
FIS1	0.0428301	0.998088	0.00880462	0.73847
GPR37	0.0428462	0.998088	0.051244	0.73847
SUMO3	0.0428618	0.998088	0.192337	0.834964
TJP1	0.0434849	0.998088	0.0850724	0.758988
CCNB2	0.0435469	0.998088	0.0651609	0.744954
PYGB	0.0435825	0.998088	0.283525	0.859875
CD38	0.0437852	0.998088	0.0122943	0.73847
BRDT	0.0440144	0.998088	0.0484292	0.73847
RASSF5	0.0441387	0.998088	0.0117124	0.73847
STAT5B	0.0442533	0.998088	0.0477681	0.73847
SKA1	0.0443353	0.998088	0.0369943	0.73847
TMEM132B	0.0444111	0.998088	0.153185	0.803977
SIRPA	0.0444313	0.998088	0.0393016	0.73847
CFP	0.0445474	0.998088	0.00493353	0.73847
REG3G	0.0447063	0.998088	0.0474663	0.73847
TAPBP	0.0454172	0.998088	0.652529	0.931904
FAIM	0.045695	0.998088	0.00338813	0.73847
PPP3R2	0.0458447	0.998088	0.0210054	0.73847
SUMO4	0.0460722	0.998088	0.525783	0.910232
RSPO3	0.0460771	0.998088	0.129068	0.793862
CNTNAP2	0.0469535	0.998088	0.206497	0.838932
CDH11	0.0472287	0.998088	0.299045	0.859875
FABP9	0.047528	0.998088	0.0300116	0.73847
KMO	0.0478903	0.998088	0.0287773	0.73847
SLC26A7	0.0483126	0.998088	0.12227	0.790179
CARD17	0.0484383	0.998088	0.0282729	0.73847
ITGA5	0.048608	0.998088	0.0269862	0.73847
STX12	0.0488749	0.998088	0.0103788	0.73847
LTA	0.0492775	0.998088	0.0223388	0.73847
RGS19	0.0496035	0.998088	0.00402459	0.73847
STAB1	0.0497119	0.998088	0.0285144	0.73847
RCAN1	0.0498021	0.998088	0.519632	0.910015
BLOC1S6	0.0499444	0.998088	0.0514291	0.73847
ZBTB10	0.0499898	0.998088	0.102323	0.772884
CILP2	0.0501104	0.998088	0.509801	0.908153
STIM1	0.0508286	0.998088	0.0173622	0.73847
PRND	0.0508814	0.998088	0.00363248	0.73847
POLR1C	0.0509493	0.998088	0.0318679	0.73847
CCL18	0.0514499	0.998088	0.0126334	0.73847
GAPDHS	0.0516868	0.998088	0.0218116	0.73847
TBCB	0.0517119	0.998088	0.216661	0.843543
PCDHGA2	0.0520236	0.998088	0.0543116	0.73847
SERPINE2	0.0520932	0.998088	0.0490453	0.73847
SPHK2	0.0526223	0.998088	0.0442288	0.73847
LSM12	0.0527587	0.998088	0.122159	0.790179
TIMP3	0.0528937	0.998088	0.155277	0.807645
EHBP1	0.0528944	0.998088	0.0350405	0.73847
MREG	0.053004	0.998088	0.119059	0.790179
IL18RAP	0.0530177	0.998088	0.0324376	0.73847
GLYAT	0.0533299	0.998088	0.101638	0.772441
ADAM15	0.0535516	0.998088	0.386879	0.875221
CRYBB1	0.0536567	0.998088	0.190788	0.834964
ENO2	0.0538186	0.998088	0.0504352	0.73847
AGA	0.0539614	0.998088	0.000615247	0.73847
PLCG2	0.0539651	0.998088	0.0475286	0.73847
CFAP300	0.0540143	0.998088	0.0846403	0.758825
TIMM10	0.0540245	0.998088	0.0183872	0.73847
CUL9	0.054111	0.998088	0.00728719	0.73847
FLT1	0.0541188	0.998088	0.0101737	0.73847
CSNK1D	0.0541482	0.998088	0.0229039	0.73847
FABP4	0.0543116	0.998088	0.152236	0.803977
CA3	0.0544699	0.998088	0.269167	0.859875
GREM2	0.0546511	0.998088	0.159002	0.808201
NAPEPLD	0.0546538	0.998088	0.0296206	0.73847
ARHGAP26	0.0547985	0.998088	0.0584584	0.739763
FEN1	0.0548212	0.998088	0.120882	0.790179
NDP	0.0549113	0.998088	0.00737262	0.73847
SPINT1	0.055005	0.998088	0.360914	0.866131
BRICD5	0.0551649	0.998088	0.0431116	0.73847
OCIAD1	0.0553406	0.998088	0.209836	0.838932
C16orf54	0.0555856	0.998088	0.251112	0.849901
CSRP2	0.0557132	0.998088	0.0474249	0.73847
FBLIM1	0.0557515	0.998088	0.212681	0.839681
NENF	0.0558653	0.998088	0.297181	0.859875
UXS1	0.0563021	0.998088	0.168308	0.821499
YWHAZ	0.0564695	0.998088	0.127817	0.793862
VMAC	0.0571915	0.998088	0.0160364	0.73847
DSG1	0.0576665	0.998088	0.0365209	0.73847
RALB	0.0577354	0.998088	0.135031	0.794705
LILRB4	0.057799	0.998088	0.070651	0.744954
OSM	0.0578417	0.998088	0.0330451	0.73847
ATG7	0.0578514	0.998088	0.514357	0.908741
ADAMTS5	0.0578668	0.998088	0.254921	0.852347
IRAG1	0.0579886	0.998088	0.364313	0.866131
NTN4	0.0580021	0.998088	0.113354	0.786146
LEFTY2	0.0584201	0.998088	0.376395	0.870172
CLK2	0.0585794	0.998088	0.044297	0.73847
CD58	0.0587088	0.998088	0.00404486	0.73847
CNDP2	0.0588828	0.998088	0.0141177	0.73847
MMP9	0.058928	0.998088	0.206436	0.838932
CRABP1	0.0590299	0.998088	0.0217747	0.73847
PBRM1	0.059247	0.998088	0.0518747	0.73847
RP9	0.0593564	0.998088	0.226346	0.84427
JPT2	0.0596692	0.998088	0.326468	0.864624
MICALL1	0.0597305	0.998088	0.0799105	0.750258
IL26	0.0598432	0.998088	0.186827	0.833497
CSF3R	0.0609646	0.998088	0.017711	0.73847
LIN7B	0.0610326	0.998088	0.379918	0.872079
C1QL2	0.0613129	0.998088	0.509356	0.908153
ADM	0.0619976	0.998088	0.108009	0.779929
WWOX	0.0622775	0.998088	0.394782	0.878572
VAPA	0.0623633	0.998088	0.467286	0.895989
KLHL14	0.0623707	0.998088	0.2558	0.853559
IL34	0.0624325	0.998088	0.0436564	0.73847
CNTN2	0.0624369	0.998088	0.483929	0.898681
CA13	0.0624872	0.998088	0.0496634	0.73847
BRF1	0.062871	0.998088	0.0240705	0.73847
PLAU	0.0629235	0.998088	0.401595	0.881725
MMP7	0.0631687	0.998088	0.389415	0.876645
CASP10	0.0633147	0.998088	0.0339259	0.73847
HES1	0.0634729	0.998088	0.0153637	0.73847
CDH12	0.0637776	0.998088	0.23827	0.849901
FEV	0.064298	0.998088	0.0235154	0.73847
MEOX2	0.0643036	0.998088	0.0947562	0.764481
AAGAB	0.0644347	0.998088	0.00480937	0.73847
CYTH2	0.0650902	0.998088	0.0147536	0.73847
TIMP1	0.065315	0.998088	0.0919237	0.759078
MST1R	0.0653952	0.998088	0.0300283	0.73847
CDKN2C	0.0654792	0.998088	0.0260167	0.73847
RBP2	0.065743	0.998088	0.197143	0.837917
ART5	0.0658685	0.998088	0.0376473	0.73847
TMOD1	0.0659125	0.998088	0.173837	0.822269
PALMD	0.0661591	0.998088	0.0709845	0.744954
NSFL1C	0.0664593	0.998088	0.240824	0.849901
CLIC4	0.0665078	0.998088	0.156864	0.807645
CDHR5	0.0666692	0.998088	0.0340519	0.73847
EPB41	0.0666786	0.998088	0.0733688	0.746906
DMRTB1	0.0669181	0.998088	0.0083956	0.73847
CD8B	0.0671043	0.998088	0.0406186	0.73847
SIRPG	0.0671866	0.998088	0.0193987	0.73847
NRL	0.0674024	0.998088	0.00741889	0.73847
EIF4A1	0.0675689	0.998088	0.134469	0.794675
SERPINC1	0.067699	0.998088	0.0716133	0.744954
SUMO3	0.0677953	0.998088	0.249643	0.849901
PPIA	0.0679264	0.998088	0.1557	0.807645
PCOLCE	0.0682431	0.998088	0.270531	0.859875
NRP1	0.0683013	0.998088	0.010077	0.73847
NPDC1	0.0686397	0.998088	0.0213502	0.73847
H2AW	0.0687062	0.998088	0.0600919	0.743579
RBM46	0.0687234	0.998088	0.0552576	0.73847
BTG1	0.0687658	0.998088	0.625525	0.925251
LRRC37A2	0.0688607	0.998088	0.0709763	0.744954
RPL38	0.0692531	0.998088	0.0760905	0.749477
PGA4	0.0693396	0.998088	0.0031418	0.73847
USP46	0.0695408	0.998088	0.0867922	0.759078
HAAO	0.0696821	0.998088	0.291369	0.859875
GTSF1	0.0696912	0.998088	0.043612	0.73847
PCSK1	0.0697831	0.998088	0.119038	0.790179
FCRL4	0.0706513	0.998088	0.771576	0.959649
GLRX2	0.0709214	0.998088	0.0994106	0.769043
SEMA4F	0.0709457	0.998088	0.0265273	0.73847
CTSA	0.0717796	0.998088	0.27302	0.859875
SULT1A1	0.0717956	0.998088	0.274376	0.859875
IGHD	0.0718302	0.998088	0.118456	0.790179
ENTPD3	0.071974	0.998088	0.0172575	0.73847
RELB	0.0719954	0.998088	0.0128642	0.73847
CCL1	0.0720652	0.998088	0.0323803	0.73847
PSAP	0.0722187	0.998088	0.0483562	0.73847
ANKRD2	0.0722952	0.998088	0.165906	0.814899
MAD2L2	0.0723002	0.998088	0.0913921	0.759078
C14orf93	0.0726395	0.998088	0.016594	0.73847
DNASE2B	0.0726467	0.998088	0.0137895	0.73847
DLGAP4	0.0727518	0.998088	0.340239	0.866131
CYB5A	0.0730478	0.998088	0.294646	0.859875
GCG	0.073322	0.998088	0.158213	0.807645
ELANE	0.0733402	0.998088	0.103612	0.777241
RNASE6	0.0738885	0.998088	0.0412821	0.73847
LCN1	0.0738986	0.998088	0.131902	0.793862
DNER	0.0740586	0.998088	0.268938	0.859875
MRTO4	0.0742414	0.998088	0.0427408	0.73847
DNMT3L	0.0742487	0.998088	0.0283825	0.73847
H2AC11	0.0743687	0.998088	0.0608482	0.743579
CTSC	0.0744476	0.998088	0.0553573	0.73847
CCN4	0.0746678	0.998088	0.019779	0.73847
MED20	0.0747599	0.998088	0.0574444	0.73847
CLTA	0.0748213	0.998088	0.374462	0.868921
ANXA7	0.0749911	0.998088	0.0540795	0.73847
SSMEM1	0.0750191	0.998088	0.370505	0.868921
MOCS3	0.0752537	0.998088	0.0337161	0.73847
FCAMR	0.0752684	0.998088	0.0777447	0.749477
LDLRAD3	0.0753598	0.998088	0.0388692	0.73847
ADA	0.0757834	0.998088	0.0210237	0.73847
FABP3	0.0760553	0.998088	0.189756	0.834896
ZFAND2B	0.0763901	0.998088	0.390485	0.877118
NELL1	0.0764722	0.998088	0.136958	0.795399
TNFRSF14	0.0766397	0.998088	0.0486573	0.73847
STX8	0.0767389	0.998088	0.128948	0.793862
LYPLAL1	0.0767421	0.998088	0.0883605	0.759078
SUFU	0.0769723	0.998088	0.0247003	0.73847
PROC	0.0769899	0.998088	0.203429	0.838932
NDUFB4	0.0771638	0.998088	0.0306963	0.73847
EBAG9	0.0772782	0.998088	0.0397866	0.73847
DDX25	0.0773238	0.998088	0.0301622	0.73847
LRRC25	0.0774933	0.998088	0.0051558	0.73847
GRB2	0.0777701	0.998088	0.065753	0.744954
SYTL2	0.0778191	0.998088	0.0337446	0.73847
FCER1A	0.0778215	0.998088	0.024403	0.73847
CUL4B	0.0778667	0.998088	0.0478136	0.73847
PIK3CG	0.0780556	0.998088	0.0362958	0.73847
VIP	0.078094	0.998088	0.00683437	0.73847
TNFRSF12A	0.0780982	0.998088	0.0318015	0.73847
TRIM62	0.0782815	0.998088	0.232589	0.849045
EPB41L1	0.0785647	0.998088	0.145477	0.80253
CRNN	0.0786514	0.998088	0.0829039	0.752124
SERPINI2	0.0787867	0.998088	0.316454	0.863908
RAB3D	0.0788097	0.998088	0.157877	0.807645
BTG4	0.0789752	0.998088	0.0151325	0.73847
ZFP36	0.0791032	0.998088	0.175399	0.82302
IL17F	0.0791708	0.998088	0.0103715	0.73847
PCP4L1	0.0794841	0.998088	0.070307	0.744954
CNGA2	0.0797269	0.998088	0.0289272	0.73847
PSG4	0.0800326	0.998088	0.0517396	0.73847
PDE2A	0.0800856	0.998088	0.0389727	0.73847
COPS7B	0.0802918	0.998088	0.0394904	0.73847
FRZB	0.080371	0.998088	0.711064	0.945102
TSSK1B	0.0804484	0.998088	0.449936	0.894351
C7	0.0804761	0.998088	0.0327758	0.73847
BPIFA2	0.0806301	0.998088	0.65491	0.932898
KYAT3	0.0807952	0.998088	0.198627	0.838932
PRL	0.081201	0.998088	0.355844	0.866131
WFDC10A	0.0812991	0.998088	0.105795	0.779929
ALPI	0.0822813	0.998088	0.1705	0.822269
FAM118A	0.0823273	0.998088	0.297671	0.859875
MACROH2A1	0.0824133	0.998088	0.174855	0.822269
MTHFSD	0.0830337	0.998088	0.0478202	0.73847
IARS1	0.0831165	0.998088	0.012605	0.73847
EMC10	0.0831638	0.998088	0.0806951	0.750258
YWHAH	0.0832018	0.998088	0.367517	0.867642
GALNT14	0.0833517	0.998088	0.425944	0.884478
GBP6	0.0833855	0.998088	0.0563157	0.73847
CYB561D1	0.0834108	0.998088	0.064582	0.744954
PHPT1	0.0834732	0.998088	0.313505	0.861624
ASRGL1	0.0834767	0.998088	0.335123	0.866131
FAM110A	0.0836664	0.998088	0.0991735	0.769043
CTRL	0.0839373	0.998088	0.0134099	0.73847
VAMP2	0.0840721	0.998088	0.0715723	0.744954
POLH	0.0841455	0.998088	0.275186	0.859875
PCSK2	0.0842236	0.998088	0.231385	0.848631
DEFB112	0.0845559	0.998088	0.0243343	0.73847
GAL3ST1	0.0846101	0.998088	0.0281329	0.73847
USP12	0.0846807	0.998088	0.0541429	0.73847
EFNA3	0.0848774	0.998088	0.326242	0.864624
PCDHA7	0.0848958	0.998088	0.0164117	0.73847
MRPL14	0.0849001	0.998088	0.0174103	0.73847
RAB7B	0.0850404	0.998088	0.0246732	0.73847
ITGA2B	0.0857492	0.998088	0.0812625	0.750258
F2	0.0857796	0.998088	0.0639548	0.744954
PPIL1	0.085944	0.998088	0.461185	0.895989
POMC	0.0860671	0.998088	0.205823	0.838932
KCNE3	0.0860875	0.998088	0.097778	0.769043
ATP2A3	0.0863876	0.998088	0.098151	0.769043
MUC16	0.0863892	0.998088	0.0908157	0.759078
UBL7	0.0864054	0.998088	0.42123	0.884478
NEFH	0.0864095	0.998088	0.0361842	0.73847
TBCE	0.0864241	0.998088	0.133853	0.793862
BCL2L1	0.0864304	0.998088	0.0437707	0.73847
ZNF334	0.0864809	0.998088	0.0324014	0.73847
PHB2	0.0869756	0.998088	0.00302232	0.73847
AK5	0.0869966	0.998088	0.0244095	0.73847
NEDD8	0.0870849	0.998088	0.314947	0.86335
ITLN1	0.087785	0.998088	0.185741	0.832862
ADGRE5	0.0878379	0.998088	0.0464632	0.73847
PRTN3	0.0878686	0.998088	0.184823	0.832862
BACH1	0.0879234	0.998088	0.0217991	0.73847
TAF10	0.0885265	0.998088	0.0761984	0.749477
F13B	0.0888529	0.998088	0.137037	0.795399
GSTA4	0.0893154	0.998088	0.0237548	0.73847
RAG1	0.0895444	0.998088	0.0582619	0.739709
CASP3	0.0896661	0.998088	0.296756	0.859875
TXNDC11	0.0896904	0.998088	0.155901	0.807645
PRPSAP1	0.0897371	0.998088	0.32154	0.864497
SAA4	0.0897797	0.998088	0.0613772	0.743579
CCK	0.0899264	0.998088	0.349265	0.866131
SLAMF8	0.0900309	0.998088	0.0275338	0.73847
CEP76	0.0902572	0.998088	0.0118353	0.73847
HK1	0.0905643	0.998088	0.0200757	0.73847
DNAJC15	0.0906503	0.998088	0.251386	0.849901
AUH	0.0906647	0.998088	0.268187	0.859875
LILRB3	0.0906679	0.998088	0.0332784	0.73847
TPSB2	0.0909556	0.998088	0.185192	0.832862
GIMAP7	0.0910031	0.998088	0.0411485	0.73847
HEXIM1	0.0913097	0.998088	0.0591199	0.741734
PLBD1	0.0915014	0.998088	0.0539864	0.73847
NRDC	0.0916552	0.998088	0.28171	0.859875
CDK5	0.0921697	0.998088	0.0525191	0.73847
HSCB	0.0921707	0.998088	0.0295859	0.73847
PPT1	0.0922108	0.998088	0.00349123	0.73847
DUSP10	0.092281	0.998088	0.0394916	0.73847
NUDT1	0.0923924	0.998088	0.186325	0.833497
UBE2D4	0.0924477	0.998088	0.387419	0.875612
YWHAH	0.0926543	0.998088	0.532307	0.910232
BPNT1	0.0926924	0.998088	0.367362	0.867642
ERMN	0.092842	0.998088	0.0550809	0.73847
TCN1	0.0934367	0.998088	0.0570234	0.73847
SPOCK3	0.0935484	0.998088	0.167601	0.819343
TMA16	0.0941063	0.998088	0.0700151	0.744954
AGER	0.0941482	0.998088	0.577958	0.917338
PPIL2	0.0945184	0.998088	0.0279198	0.73847
CUL3	0.0946392	0.998088	0.235828	0.849641
IRAG2	0.0954663	0.998088	0.0156843	0.73847
ZFP91	0.0957517	0.998088	0.308401	0.859875
NUDCD3	0.0957766	0.998088	0.098016	0.769043
FABP1	0.0958789	0.998088	0.074575	0.749477
IL10RB	0.0958861	0.998088	0.189605	0.834896
CLPS	0.0959712	0.998088	0.0972683	0.769043
RAB21	0.0959945	0.998088	0.298508	0.859875
NTMT1	0.0960031	0.998088	0.256264	0.854341
SYT6	0.0961534	0.998088	0.225257	0.84427
APP	0.0964705	0.998088	0.0837967	0.754999
MED11	0.0965504	0.998088	0.0894882	0.759078
HSPB1	0.0965869	0.998088	0.058336	0.739709
GAGE2D	0.0970656	0.998088	0.146705	0.802968
KIR3DL1	0.0973289	0.998088	0.107767	0.779929
VSIG1	0.0974418	0.998088	0.122438	0.790179
TSR3	0.0974719	0.998088	0.174011	0.822269
PDCD1LG2	0.0978349	0.998088	0.12808	0.793862
PEF1	0.0979262	0.998088	0.514702	0.908833
LEG1	0.0981057	0.998088	0.074085	0.749477
INO80E	0.0982017	0.998088	0.04141	0.73847
LRP1	0.0983031	0.998088	0.178452	0.825001
ANPEP	0.0983342	0.998088	0.263429	0.857524
C3orf18	0.0987979	0.998088	0.00837514	0.73847
IL4R	0.0988377	0.998088	0.942619	0.990592
ARFGAP2	0.0988563	0.998088	0.200891	0.838932
PTPN2	0.0990601	0.998088	0.282817	0.859875
PDE5A	0.0992227	0.998088	0.0179792	0.73847
FGF16	0.099602	0.998088	0.0211264	0.73847
PDCD6	0.0996146	0.998088	0.0177412	0.73847
ATP6V1F	0.0996557	0.998088	0.0211799	0.73847
TCN2	0.0997242	0.998088	0.0832767	0.752124
CERS5	0.099746	0.998088	0.0664393	0.744954
SNIP1	0.099801	0.998088	0.411084	0.884414
GALK1	0.100085	0.998088	0.467502	0.895989
DDHD2	0.100245	0.998088	0.135727	0.795168
FXN	0.100333	0.998088	0.0528902	0.73847
FGF8	0.100369	0.998088	0.0728268	0.745109
PSG1	0.100543	0.998088	0.0975977	0.769043
ZNF276	0.10066	0.998088	0.0409346	0.73847
C1orf50	0.100682	0.998088	0.0576148	0.739356
KIR3DL3	0.100795	0.998088	0.332583	0.866131
DBI	0.100816	0.998088	0.402509	0.881725
NPPB	0.101027	0.998088	0.0899235	0.759078
YJEFN3	0.101053	0.998088	0.220666	0.84427
USP15	0.1013	0.998088	0.383646	0.874693
HBEGF	0.101428	0.998088	0.498436	0.903631
TSTD1	0.101572	0.998088	0.262779	0.857524
FGF17	0.10178	0.998088	0.365393	0.866131
MYNN	0.102066	0.998088	0.0902491	0.759078
ANXA11	0.102122	0.998088	0.110633	0.782808
FAM107A	0.102192	0.998088	0.252052	0.849901
CASP10	0.1024	0.998088	0.826223	0.973571
MNDA	0.102508	0.998088	0.145179	0.80253
L3MBTL2	0.102598	0.998088	0.225975	0.84427
HMGA2	0.102674	0.998088	0.371375	0.868921
UBC	0.102777	0.998088	0.0646698	0.744954
MICA	0.103344	0.998088	0.0544916	0.73847
UBE2I	0.103514	0.998088	0.200404	0.838932
RBBP5	0.103518	0.998088	0.123321	0.791971
BIN2	0.103652	0.998088	0.150703	0.803977
CD86	0.103715	0.998088	0.331019	0.866101
GFPT1	0.103724	0.998088	0.175336	0.82302
CFH	0.103742	0.998088	0.0182172	0.73847
SPAST	0.103815	0.998088	0.20856	0.838932
SOST	0.103963	0.998088	0.0732833	0.746906
IL36B	0.104059	0.998088	0.081233	0.750258
FOXO4	0.104125	0.998088	0.116845	0.78991
HLA-DRB3	0.104183	0.998088	0.190291	0.834964
TFF1	0.104287	0.998088	0.0535413	0.73847
MTHFD2L	0.104354	0.998088	0.0339544	0.73847
EXOSC1	0.104432	0.998088	0.656502	0.932905
CEBPB	0.104452	0.998088	0.0119464	0.73847
ACY3	0.104515	0.998088	0.00897869	0.73847
TAGLN3	0.104545	0.998088	0.197236	0.837917
CXCL12	0.104581	0.998088	0.192052	0.834964
GP5	0.104597	0.998088	0.19939	0.838932
CCN3	0.104691	0.998088	0.0251792	0.73847
MAGEA5	0.104751	0.998088	0.0236325	0.73847
ADAMTS3	0.104781	0.998088	0.00715516	0.73847
FLT4	0.104826	0.998088	0.446008	0.894102
CDH17	0.104876	0.998088	0.0448	0.73847
UCK1	0.10503	0.998088	0.501929	0.903631
MYZAP	0.105392	0.998088	0.0747321	0.749477
PPM1L	0.105467	0.998088	0.0544858	0.73847
PRKAR2A	0.105495	0.998088	0.279885	0.859875
PEX14	0.105767	0.998088	0.421133	0.884478
CDK8	0.10579	0.998088	0.0884272	0.759078
RAMP3	0.106044	0.998088	0.175989	0.824201
ZSWIM7	0.106093	0.998088	0.115289	0.786952
HAPLN4	0.106498	0.998088	0.878925	0.979475
CHCHD10	0.106566	0.998088	0.378252	0.871838
NTRK1	0.106685	0.998088	0.0729878	0.745109
RLN2	0.106874	0.998088	0.0351843	0.73847
DEFA3	0.106973	0.998088	0.139926	0.795734
UAP1	0.107305	0.998088	0.0480514	0.73847
GJA1	0.107318	0.998088	0.513635	0.908741
VIT	0.107368	0.998088	0.21975	0.84427
TXNRD3NB	0.107371	0.998088	0.852291	0.976096
APOC2	0.107539	0.998088	0.511562	0.908741
UBQLN4	0.107689	0.998088	0.774957	0.96091
AURKB	0.107782	0.998088	0.0734839	0.747035
HAVCR1	0.108282	0.998088	0.0433888	0.73847
WBP2	0.108812	0.998088	0.26914	0.859875
PAWR	0.108879	0.998088	0.0378313	0.73847
MMP8	0.10902	0.998088	0.165923	0.814899
STAU2	0.109021	0.998088	0.0206528	0.73847
IFNA5	0.109025	0.998088	0.0417844	0.73847
FGG	0.109136	0.998088	0.247941	0.849901
GLDN	0.109179	0.998088	0.246579	0.849901
SPCS1	0.109316	0.998088	0.0160245	0.73847
NR3C2	0.109393	0.998088	0.257645	0.854788
ERAP2	0.1096	0.998088	0.152595	0.803977
VCPIP1	0.109619	0.998088	0.338337	0.866131
CTSD	0.109793	0.998088	0.225243	0.84427
PIP	0.110132	0.998088	0.192266	0.834964
UNC13A	0.110182	0.998088	0.153202	0.803977
GGA1	0.110266	0.998088	0.552419	0.910738
ADAM10	0.110525	0.998088	0.0102207	0.73847
VPS28	0.110636	0.998088	0.0551056	0.73847
CDK2	0.110851	0.998088	0.285716	0.859875
LRRC20	0.111354	0.998088	0.0933918	0.762299
KCNG4	0.111572	0.998088	0.0138605	0.73847
TAF12	0.111874	0.998088	0.448632	0.894193
PTPN11	0.112348	0.998088	0.683476	0.937862
PXDNL	0.112462	0.998088	0.0552478	0.73847
KLK12	0.112958	0.998088	0.0491521	0.73847
DYNLL2	0.113136	0.998088	0.270376	0.859875
ELFN2	0.113216	0.998088	0.133095	0.793862
CCL3L1	0.113543	0.998088	0.0389888	0.73847
ARF3	0.113745	0.998088	0.0703091	0.744954
C8A	0.114037	0.998088	0.0455793	0.73847
OMP	0.114209	0.998088	0.148676	0.803977
CD86	0.114518	0.998088	0.46407	0.895989
ANGPTL3	0.114804	0.998088	0.159302	0.808201
GSTM5	0.114846	0.998088	0.0310905	0.73847
ACP1	0.114906	0.998088	0.659383	0.933251
MRM1	0.115372	0.998088	0.300026	0.859875
AOC3	0.115396	0.998088	0.0319804	0.73847
STARD7	0.115431	0.998088	0.285209	0.859875
CADM1	0.115588	0.998088	0.272885	0.859875
PLEKHM2	0.115636	0.998088	0.701267	0.941698
ACAA1	0.115899	0.998088	0.482017	0.89788
CTNNA3	0.115979	0.998088	0.0454475	0.73847
ARL9	0.116003	0.998088	0.0768049	0.749477
DVL2	0.116369	0.998088	0.165162	0.814899
DSG2	0.116615	0.998088	0.319204	0.864293
PRSS22	0.116837	0.998088	0.824388	0.97337
FUNDC1	0.116936	0.998088	0.179696	0.825001
HOXC11	0.117115	0.998088	0.0417689	0.73847
TPM2	0.117485	0.998088	0.0415916	0.73847
IRF6	0.117507	0.998088	0.272182	0.859875
SNX7	0.117617	0.998088	0.0413561	0.73847
CROT	0.117668	0.998088	0.278249	0.859875
WAS	0.117825	0.998088	0.019615	0.73847
FAM24B	0.117875	0.998088	0.0691876	0.744954
TPT1	0.118646	0.998088	0.130067	0.793862
CRCP	0.118739	0.998088	0.0433614	0.73847
COCH	0.118977	0.998088	0.0620539	0.744343
ECM1	0.119016	0.998088	0.828713	0.973676
CEACAM21	0.119097	0.998088	0.534015	0.910232
PSD	0.119263	0.998088	0.0276817	0.73847
NOTCH2	0.11927	0.998088	0.145829	0.80253
CTNNB1	0.119276	0.998088	0.0406699	0.73847
FCRL2	0.11931	0.998088	0.0672586	0.744954
DNAJB11	0.119374	0.998088	0.114772	0.786952
HBD	0.119486	0.998088	0.0257373	0.73847
IL10RA	0.119615	0.998088	0.0200243	0.73847
XRCC1	0.119759	0.998088	0.220092	0.84427
ASL	0.119789	0.998088	0.512907	0.908741
LCK	0.119943	0.998088	0.786923	0.964338
CLSTN2	0.120012	0.998088	0.0258203	0.73847
VPS9D1	0.120167	0.998088	0.0136154	0.73847
ANXA10	0.120353	0.998088	0.129745	0.793862
JPH3	0.120357	0.998088	0.0555248	0.73847
LRRN1	0.120411	0.998088	0.05072	0.73847
SAR1B	0.120431	0.998088	0.0419945	0.73847
AFM	0.120451	0.998088	0.46525	0.895989
ITGA6	0.120658	0.998088	0.249477	0.849901
GPR142	0.120835	0.998088	0.236277	0.849641
PSMB3	0.120873	0.998088	0.0519469	0.73847
PHGDH	0.120962	0.998088	0.0229099	0.73847
HIBCH	0.121337	0.998088	0.161698	0.814899
LCN10	0.121366	0.998088	0.0306343	0.73847
EPHB3	0.121549	0.998088	0.0391171	0.73847
YWHAG	0.121617	0.998088	0.396892	0.878824
RTF2	0.121641	0.998088	0.253581	0.850856
RDH10	0.1218	0.998088	0.433502	0.886952
SPINK14	0.121902	0.998088	0.131758	0.793862
HSH2D	0.121946	0.998088	0.0459325	0.73847
KPNB1	0.122114	0.998088	0.357059	0.866131
IL36RN	0.122306	0.998088	0.0678637	0.744954
IGFBP6	0.12257	0.998088	0.0487196	0.73847
ITGAV	0.122689	0.998088	0.0505613	0.73847
DPP10	0.123183	0.998088	0.0726555	0.745109
BCL2L10	0.123334	0.998088	0.402751	0.881725
FKBP1A	0.123537	0.998088	0.0378873	0.73847
ANXA13	0.123577	0.998088	0.160681	0.81052
LINGO1	0.123708	0.998088	0.332579	0.866131
LTBR	0.123742	0.998088	0.0551661	0.73847
CD274	0.123819	0.998088	0.144542	0.80253
CASP4	0.123916	0.998088	0.0882383	0.759078
FABP4	0.124015	0.998088	0.198676	0.838932
SF3B4	0.12402	0.998088	0.812347	0.97037
RPLP2	0.124245	0.998088	0.197935	0.838582
EEF1G	0.12427	0.998088	0.158227	0.807645
BRAF	0.124485	0.998088	0.0411546	0.73847
DNAJB4	0.12482	0.998088	0.329257	0.865339
FCGR2B	0.12495	0.998088	0.675267	0.936683
UBE2K	0.125173	0.998088	0.382384	0.872909
MYB	0.125193	0.998088	0.0396249	0.73847
SHC1	0.125257	0.998088	0.221177	0.84427
TNXB	0.12531	0.998088	0.834213	0.974595
KIRREL2	0.125356	0.998088	0.128401	0.793862
LRRC74A	0.125416	0.998088	0.0330264	0.73847
CD300LG	0.125562	0.998088	0.099995	0.769043
AXIN2	0.125684	0.998088	0.513263	0.908741
NSL1	0.125886	0.998088	0.0655002	0.744954
COLGALT1	0.126368	0.998088	0.522039	0.910232
RAB11A	0.126592	0.998088	0.179129	0.825001
CD14	0.126641	0.998088	0.176124	0.824201
ARHGDIB	0.126823	0.998088	0.170517	0.822269
TMPRSS11D	0.126933	0.998088	0.0318638	0.73847
IL17RC	0.126935	0.998088	0.171696	0.822269
RGS10	0.126939	0.998088	0.356783	0.866131
NEURL1	0.127172	0.998088	0.155453	0.807645
SCGB3A1	0.127195	0.998088	0.0396991	0.73847
ASNS	0.127388	0.998088	0.0763214	0.749477
HMGN1	0.12742	0.998088	0.0756301	0.749477
TTC9B	0.127505	0.998088	0.10788	0.779929
EDA	0.128132	0.998088	0.208508	0.838932
PLVAP	0.128203	0.998088	0.119226	0.790179
FOXJ2	0.128285	0.998088	0.160496	0.810151
ANP32A	0.128543	0.998088	0.0769315	0.749477
DKK3	0.128905	0.998088	0.152164	0.803977
IL17F	0.128991	0.998088	0.288031	0.859875
H2BC21	0.129047	0.998088	0.082556	0.75125
YES1	0.129325	0.998088	0.0524072	0.73847
ARC	0.129429	0.998088	0.038926	0.73847
TAFA5	0.129457	0.998088	0.482988	0.898315
RAB24	0.129486	0.998088	0.13968	0.795734
EXTL2	0.12963	0.998088	0.0302744	0.73847
INHBA	0.130036	0.998088	0.604568	0.921323
CRYGC	0.130053	0.998088	0.0440278	0.73847
CD93	0.130085	0.998088	0.688911	0.93865
AFP	0.13025	0.998088	0.0115886	0.73847
EIF4G2	0.130567	0.998088	0.144105	0.80253
CHRNB3	0.13057	0.998088	0.257838	0.854788
SNCA	0.130687	0.998088	0.501627	0.903631
C3	0.13079	0.998088	0.0290474	0.73847
SEPTIN11	0.130934	0.998088	0.0808843	0.750258
C11orf49	0.13108	0.998088	0.799298	0.968915
HAO1	0.131225	0.998088	0.861394	0.976676
FSTL5	0.131358	0.998088	0.0729257	0.745109
GPC3	0.131396	0.998088	0.716741	0.946832
ODC1	0.131568	0.998088	0.0428596	0.73847
FSTL1	0.131662	0.998088	0.103806	0.777375
LCNL1	0.132032	0.998088	0.00980187	0.73847
PRCP	0.132384	0.998088	0.0914207	0.759078
GFAP	0.132553	0.998088	0.495022	0.903597
NECTIN3	0.132561	0.998088	0.0137377	0.73847
NRG3	0.13308	0.998088	0.12467	0.793862
PRSS3	0.133302	0.998088	0.200609	0.838932
ACE2	0.13353	0.998088	0.364813	0.866131
KIR2DL1	0.133802	0.998088	0.088208	0.759078
CHST6	0.133897	0.998088	0.38031	0.872079
ANXA8	0.133953	0.998088	0.453823	0.895356
PRDX1	0.134505	0.998088	0.316844	0.863983
EIF4A2	0.134752	0.998088	0.229191	0.844578
RAD51	0.134813	0.998088	0.06121	0.743579
PRMT2	0.134867	0.998088	0.0475619	0.73847
PTRH2	0.134978	0.998088	0.106694	0.779929
NRN1L	0.135171	0.998088	0.376975	0.870375
MPZL2	0.135371	0.998088	0.0166788	0.73847
NLRP10	0.135518	0.998088	0.854417	0.976096
ULK3	0.135524	0.998088	0.965451	0.993427
GRAP	0.135693	0.998088	0.011909	0.73847
GDF10	0.135959	0.998088	0.0256739	0.73847
FNDC8	0.136146	0.998088	0.419829	0.884478
GFER	0.136354	0.998088	0.267864	0.859875
NR5A2	0.13655	0.998088	0.493766	0.90291
KCNIP1	0.136761	0.998088	0.135768	0.795168
IL17A	0.137148	0.998088	0.278215	0.859875
PLCG1	0.137175	0.998088	0.0892727	0.759078
ARF4	0.137442	0.998088	0.0886142	0.759078
RAB11B	0.137587	0.998088	0.141095	0.796006
NPIPB3	0.137591	0.998088	0.033386	0.73847
PET117	0.137602	0.998088	0.0205117	0.73847
MAP1LC3B	0.137737	0.998088	0.762323	0.95643
CRELD1	0.137999	0.998088	0.1485	0.803977
VCX3A	0.138	0.998088	0.0154472	0.73847
IFNGR2	0.13814	0.998088	0.163705	0.814899
SMN1	0.138215	0.998088	0.0606271	0.743579
FDPS	0.138335	0.998088	0.429071	0.884974
TCF4	0.138458	0.998088	0.35969	0.866131
C1QTNF9	0.138592	0.998088	0.0316773	0.73847
SUGT1	0.138754	0.998088	0.399351	0.880392
CD72	0.138964	0.998088	0.250352	0.849901
LILRA6	0.139023	0.998088	0.413803	0.884478
TNC	0.139124	0.998088	0.243948	0.849901
IL11RA	0.139311	0.998088	0.808779	0.969827
SIGLEC15	0.139328	0.998088	0.0382692	0.73847
APOH	0.139475	0.998088	0.0888873	0.759078
TNNT3	0.139605	0.998088	0.0386161	0.73847
NRXN1	0.139688	0.998088	0.173543	0.822269
MNX1	0.139693	0.998088	0.510257	0.908279
CYTH4	0.139791	0.998088	0.865282	0.976676
KPNA4	0.139804	0.998088	0.0888116	0.759078
RAD51C	0.139806	0.998088	0.629799	0.925251
APOL1	0.13983	0.998088	0.0812739	0.750258
MALT1	0.139893	0.998088	0.0180376	0.73847
KCTD7	0.140079	0.998088	0.0118664	0.73847
TIMM13	0.140246	0.998088	0.329968	0.865339
AGFG1	0.140345	0.998088	0.452946	0.895356
EIF2B1	0.14059	0.998088	0.248378	0.849901
SNRPE	0.140617	0.998088	0.0798306	0.750258
DPEP1	0.140938	0.998088	0.00845824	0.73847
EMILIN3	0.140948	0.998088	0.308104	0.859875
PDIA5	0.141003	0.998088	0.25779	0.854788
MAT1A	0.141188	0.998088	0.164615	0.814899
APCDD1	0.141234	0.998088	0.127794	0.793862
ATG4B	0.141274	0.998088	0.248238	0.849901
CD96	0.141303	0.998088	0.0342257	0.73847
RND1	0.141422	0.998088	0.0593281	0.742269
CSNK2A1	0.141644	0.998088	0.223201	0.84427
IL7R	0.141981	0.998088	0.082192	0.750258
PSG3	0.141981	0.998088	0.0759028	0.749477
TBC1D13	0.141994	0.998088	0.278937	0.859875
RELN	0.142116	0.998088	0.358392	0.866131
CALR	0.142199	0.998088	0.733493	0.947613
ADGRE5	0.142423	0.998088	0.559528	0.910946
PNP	0.142673	0.998088	0.290068	0.859875
GBP5	0.14279	0.998088	0.0307519	0.73847
GCNT4	0.142841	0.998088	0.0268738	0.73847
ASCC2	0.142926	0.998088	0.117391	0.790088
CD27	0.142996	0.998088	0.413888	0.884478
IL37	0.14318	0.998088	0.0298449	0.73847
IGLL1	0.143273	0.998088	0.687974	0.93865
NEIL2	0.143534	0.998088	0.0373203	0.73847
GLYATL2	0.143725	0.998088	0.241853	0.849901
PDIA6	0.143884	0.998088	0.228488	0.844578
CRIM1	0.143982	0.998088	0.0770237	0.749477
PROK1	0.144064	0.998088	0.0153909	0.73847
CHCHD7	0.144114	0.998088	0.0381137	0.73847
HGD	0.144137	0.998088	0.0957067	0.767167
SYNCRIP	0.144262	0.998088	0.0634305	0.744954
ITGA2B	0.144386	0.998088	0.0542177	0.73847
GCH1	0.144746	0.998088	0.0632868	0.744954
IL13	0.145042	0.998088	0.0106029	0.73847
RGS16	0.145134	0.998088	0.0209111	0.73847
G3BP1	0.145152	0.998088	0.470108	0.895989
TP53	0.14549	0.998088	0.0925806	0.759078
OCIAD1	0.145578	0.998088	0.0812842	0.750258
LGMN	0.145669	0.998088	0.138411	0.795734
TRIM28	0.145676	0.998088	0.127243	0.793862
CXCL14	0.145767	0.998088	0.210531	0.838932
RB1	0.145913	0.998088	0.0203351	0.73847
BIRC7	0.146298	0.998088	0.19627	0.835636
FMR1	0.146477	0.998088	0.102045	0.772571
CDX1	0.146656	0.998088	0.318383	0.864293
PYDC1	0.146687	0.998088	0.116261	0.789519
IRF5	0.146958	0.998088	0.0258207	0.73847
RGS13	0.147033	0.998088	0.0458989	0.73847
PAM	0.147502	0.998088	0.427723	0.884556
MEIS2	0.14767	0.998088	0.0308083	0.73847
KLHL13	0.147754	0.998088	0.501088	0.903631
FOLH1	0.147782	0.998088	0.0616143	0.743579
NTS	0.147823	0.998088	0.0216319	0.73847
H2BC21	0.14791	0.998088	0.0922336	0.759078
PRSS37	0.148057	0.998088	0.295813	0.859875
PTK6	0.148077	0.998088	0.105697	0.779929
SNPH	0.148296	0.998088	0.277065	0.859875
C16orf72	0.148316	0.998088	0.290858	0.859875
TCEAL3	0.148472	0.998088	0.268088	0.859875
LACTB2	0.148705	0.998088	0.528933	0.910232
DEFB4A	0.148766	0.998088	0.282859	0.859875
RNF149	0.148901	0.998088	0.321228	0.864497
GIPC1	0.149088	0.998088	0.122634	0.790179
PRRG4	0.149601	0.998088	0.302083	0.859875
PRKAR2B	0.149754	0.998088	0.514295	0.908741
TOX3	0.149808	0.998088	0.059123	0.741734
RAB5B	0.149919	0.998088	0.372583	0.868921
CYGB	0.150008	0.998088	0.6687	0.935173
DDI1	0.150028	0.998088	0.122561	0.790179
HAMP	0.150043	0.998088	0.152434	0.803977
MUC1	0.150071	0.998088	0.031466	0.73847
DNAJB2	0.150094	0.998088	0.0416366	0.73847
TRUB1	0.150374	0.998088	0.806937	0.969301
ASMTL	0.150502	0.998088	0.191494	0.834964
MAP1LC3B2	0.15071	0.998088	0.101029	0.770999
RPS3	0.151348	0.998088	0.181436	0.826038
CXCL8	0.151392	0.998088	0.145437	0.80253
HDAC6	0.151406	0.998088	0.0198557	0.73847
MATN4	0.151583	0.998088	0.818465	0.97284
LILRB2	0.151726	0.998088	0.0919181	0.759078
C5orf63	0.151786	0.998088	0.0178097	0.73847
ZG16	0.15212	0.998088	0.227478	0.844578
IL1B	0.152254	0.998088	0.221892	0.84427
SLITRK3	0.152746	0.998088	0.340247	0.866131
ST8SIA1	0.152779	0.998088	0.338868	0.866131
RPS6KB1	0.152819	0.998088	0.158584	0.807989
NECAB1	0.152999	0.998088	0.0112744	0.73847
POLR3F	0.153088	0.998088	0.226598	0.84427
AK1	0.15313	0.998088	0.426767	0.884478
DCLK1	0.153145	0.998088	0.0690064	0.744954
TANK	0.153179	0.998088	0.0268434	0.73847
IFNA21	0.153381	0.998088	0.287559	0.859875
ITGA2B	0.153432	0.998088	0.10487	0.779929
SENP7	0.153701	0.998088	0.0444221	0.73847
ITPK1	0.153787	0.998088	0.132122	0.793862
APLP2	0.15389	0.998088	0.353973	0.866131
TTC1	0.153988	0.998088	0.162494	0.814899
RAB17	0.154075	0.998088	0.0537393	0.73847
ZAP70	0.154284	0.998088	0.0154371	0.73847
ZAP70	0.154312	0.998088	0.0549067	0.73847
CXCL9	0.15433	0.998088	0.025451	0.73847
CSDC2	0.154454	0.998088	0.275863	0.859875
CD9	0.154535	0.998088	0.134967	0.794705
RAB2A	0.154707	0.998088	0.0821478	0.750258
KLK3	0.154863	0.998088	0.373917	0.868921
CYP2C19	0.154895	0.998088	0.429408	0.885083
NLGN1	0.154925	0.998088	0.0358755	0.73847
VTA1	0.155571	0.998088	0.340797	0.866131
RAB13	0.15567	0.998088	0.614632	0.923361
FCGR2B	0.155715	0.998088	0.440468	0.888558
MGP	0.15575	0.998088	0.77503	0.96091
LTB4R	0.155838	0.998088	0.273352	0.859875
FAM20C	0.155905	0.998088	0.416118	0.884478
PRC1	0.156448	0.998088	0.100852	0.770999
UBB	0.156451	0.998088	0.410918	0.884414
MTMR6	0.156504	0.998088	0.10001	0.769043
F3	0.156741	0.998088	0.0686678	0.744954
HLA-G	0.156834	0.998088	0.520475	0.910015
PDCD4	0.157257	0.998088	0.0229664	0.73847
CSDE1	0.157265	0.998088	0.0202471	0.73847
MITF	0.157288	0.998088	0.0957033	0.767167
DNAJB3	0.157553	0.998088	0.498373	0.903631
MUC1	0.15783	0.998088	0.174968	0.822269
ACADSB	0.157987	0.998088	0.100644	0.770999
KLK15	0.158273	0.998088	0.573841	0.91563
COQ7	0.15858	0.998088	0.434593	0.887075
TBC1D25	0.159	0.998088	0.666918	0.934683
ST3GAL5	0.159032	0.998088	0.0544569	0.73847
SRP19	0.15921	0.998088	0.047279	0.73847
CAPNS2	0.159433	0.998088	0.0214378	0.73847
CCDC89	0.159507	0.998088	0.177658	0.825001
VAMP1	0.159534	0.998088	0.106191	0.779929
AFAP1L2	0.159593	0.998088	0.433303	0.886952
DTX1	0.15965	0.998088	0.0339099	0.73847
KNG1	0.160429	0.998088	0.0245278	0.73847
IRF3	0.160751	0.998088	0.532649	0.910232
SOX10	0.161032	0.998088	0.354162	0.866131
NAGPA	0.161043	0.998088	0.17727	0.82472
CPQ	0.161238	0.998088	0.106057	0.779929
SERPINF1	0.161383	0.998088	0.122987	0.790739
HARS1	0.16139	0.998088	0.583423	0.918164
AZU1	0.161419	0.998088	0.159284	0.808201
REG3A	0.161505	0.998088	0.30134	0.859875
GPNMB	0.161621	0.998088	0.578484	0.917338
ZFAND3	0.161633	0.998088	0.1209	0.790179
DUSP13	0.161853	0.998088	0.0822101	0.750258
FAM110A	0.161859	0.998088	0.0243959	0.73847
PCNA	0.162055	0.998088	0.158106	0.807645
FAM50A	0.162228	0.998088	0.110682	0.782808
MAPK6	0.162282	0.998088	0.122717	0.790179
ATIC	0.162482	0.998088	0.395974	0.878824
COLEC11	0.162488	0.998088	0.756244	0.95643
CLMP	0.162769	0.998088	0.206958	0.838932
FGF10	0.162776	0.998088	0.173246	0.822269
RAB1A	0.162791	0.998088	0.935109	0.989136
CRKL	0.162982	0.998088	0.435474	0.888144
CTNNB1	0.163259	0.998088	0.127808	0.793862
LTK	0.163556	0.998088	0.574697	0.916022
DSTN	0.163582	0.998088	0.29021	0.859875
MCCD1	0.164056	0.998088	0.565902	0.912646
NPW	0.164152	0.998088	0.110833	0.782808
ADAM15	0.164214	0.998088	0.0964388	0.768608
IL22RA1	0.164626	0.998088	0.491823	0.901593
CAMK2D	0.16467	0.998088	0.0775622	0.749477
ZNF329	0.164766	0.998088	0.345765	0.866131
ADIPOQ	0.16516	0.998088	0.0480699	0.73847
ST8SIA3	0.165231	0.998088	0.0386191	0.73847
ETFA	0.165432	0.998088	0.0710388	0.744954
RNASE3	0.165455	0.998088	0.0694252	0.744954
ANAPC7	0.165476	0.998088	0.31531	0.863579
GPD1	0.16556	0.998088	0.93845	0.990065
PCDHB2	0.165624	0.998088	0.214527	0.84177
CD22	0.165791	0.998088	0.0311298	0.73847
CFAP298	0.165927	0.998088	0.302157	0.859875
CNTN4	0.166342	0.998088	0.714353	0.946025
TNC	0.166537	0.998088	0.115459	0.786952
ALAD	0.166559	0.998088	0.831915	0.973856
UBA1	0.16692	0.998088	0.338509	0.866131
MAGIX	0.166998	0.998088	0.0175287	0.73847
TYW3	0.167553	0.998088	0.242418	0.849901
NME2	0.167599	0.998088	0.420107	0.884478
ENGASE	0.167811	0.998088	0.0789165	0.750258
EEF1D	0.168103	0.998088	0.176489	0.824201
PNP	0.168126	0.998088	0.331645	0.866131
ACYP2	0.168282	0.998088	0.30478	0.859875
HNRNPDL	0.168462	0.998088	0.40591	0.882776
DEFA5	0.168548	0.998088	0.334282	0.866131
DEFA5	0.168726	0.998088	0.367768	0.867642
TRIL	0.168767	0.998088	0.724319	0.947613
SPARCL1	0.16878	0.998088	0.148997	0.803977
GJA8	0.168973	0.998088	0.0177198	0.73847
LCP1	0.169005	0.998088	0.357141	0.866131
NR1D2	0.169101	0.998088	0.455602	0.895989
CHMP6	0.169335	0.998088	0.820374	0.97284
CARD18	0.169349	0.998088	0.0121998	0.73847
ADGRB1	0.1694	0.998088	0.079729	0.750258
BLVRB	0.169503	0.998088	0.387616	0.875612
AKR1B1	0.169526	0.998088	0.106973	0.779929
ISCU	0.169683	0.998088	0.220862	0.84427
RPP25L	0.169686	0.998088	0.112696	0.784587
SEC61G	0.169976	0.998088	0.155041	0.807645
MTFR1	0.170099	0.998088	0.0403917	0.73847
SPATA46	0.170205	0.998088	0.127423	0.793862
GOLPH3	0.170283	0.998088	0.303297	0.859875
SUSD3	0.170388	0.998088	0.376062	0.870172
OPRPN	0.170485	0.998088	0.0276114	0.73847
FOXP1	0.171011	0.998088	0.752709	0.954671
DKK2	0.171787	0.998088	0.157893	0.807645
HDGFL3	0.171862	0.998088	0.947068	0.990907
C5	0.171897	0.998088	0.163087	0.814899
IFNL1	0.172064	0.998088	0.0316984	0.73847
GALNT10	0.172071	0.998088	0.103341	0.777036
TIPRL	0.172183	0.998088	0.501668	0.903631
PKN1	0.172475	0.998088	0.0685282	0.744954
SPC25	0.17253	0.998088	0.153537	0.803977
PCDHGC5	0.172767	0.998088	0.0818801	0.750258
RNF24	0.172845	0.998088	0.168979	0.822269
CA5A	0.172905	0.998088	0.155559	0.807645
KLRB1	0.172929	0.998088	0.398462	0.879585
DPH7	0.173198	0.998088	0.618113	0.924066
RGS8	0.173205	0.998088	0.0534184	0.73847
STK16	0.173281	0.998088	0.0672388	0.744954
RAD18	0.173307	0.998088	0.0255671	0.73847
MTMR7	0.173375	0.998088	0.153538	0.803977
SMNDC1	0.173449	0.998088	0.0681349	0.744954
MEGF10	0.173584	0.998088	0.642624	0.929545
NUBP1	0.173595	0.998088	0.642992	0.929545
RETREG1	0.173643	0.998088	0.2258	0.84427
NID1	0.173647	0.998088	0.66098	0.933957
USP14	0.173867	0.998088	0.518524	0.910015
GALP	0.174164	0.998088	0.0442284	0.73847
A2ML1	0.174188	0.998088	0.607884	0.921323
RABEPK	0.1742	0.998088	0.0397739	0.73847
ARMC8	0.174306	0.998088	0.0797191	0.750258
SCMH1	0.174395	0.998088	0.112887	0.784587
PTPRH	0.17455	0.998088	0.0556255	0.73847
SMAD2	0.174761	0.998088	0.029181	0.73847
CXCL16	0.174889	0.998088	0.539732	0.910232
DRGX	0.174935	0.998088	0.0814637	0.750258
TSNARE1	0.175118	0.998088	0.0634385	0.744954
PTRHD1	0.175457	0.998088	0.213006	0.839697
OPTC	0.17558	0.998088	0.0337	0.73847
KLK13	0.175624	0.998088	0.111673	0.783432
CAMK1D	0.175697	0.998088	0.119525	0.790179
ZNF560	0.175703	0.998088	0.35539	0.866131
DIXDC1	0.17573	0.998088	0.309176	0.859875
BCHE	0.175905	0.998088	0.24766	0.849901
UNC93B1	0.176032	0.998088	0.0329896	0.73847
SEC22A	0.176178	0.998088	0.836194	0.974699
C1orf162	0.17624	0.998088	0.252039	0.849901
LEFTY2	0.176251	0.998088	0.706949	0.943773
HTN3	0.176377	0.998088	0.392338	0.877924
ACADS	0.176419	0.998088	0.0247482	0.73847
SCARF1	0.176516	0.998088	0.184297	0.832862
C1GALT1C1	0.176681	0.998088	0.326045	0.864624
SNUPN	0.176761	0.998088	0.806579	0.969301
CHST12	0.176839	0.998088	0.166966	0.818437
H2AC1	0.176914	0.998088	0.182555	0.828547
RNASE13	0.177079	0.998088	0.71502	0.946564
AGO3	0.177254	0.998088	0.215994	0.842815
KCNRG	0.177646	0.998088	0.0507135	0.73847
UBA7	0.178123	0.998088	0.331045	0.866101
BMP8B	0.178225	0.998088	0.115223	0.786952
POGLUT3	0.178236	0.998088	0.614711	0.923361
SPRED1	0.17866	0.998088	0.0629311	0.744954
CRIM1	0.17869	0.998088	0.0175657	0.73847
DEFB132	0.179086	0.998088	0.050033	0.73847
POLB	0.179358	0.998088	0.0640641	0.744954
PLEKHB1	0.179402	0.998088	0.226791	0.84427
TIAM2	0.179473	0.998088	0.173055	0.822269
HSPA1A	0.179558	0.998088	0.730072	0.947613
ZNF41	0.179707	0.998088	0.0701754	0.744954
PLG	0.179769	0.998088	0.49543	0.903597
CAV2	0.179891	0.998088	0.0989203	0.769043
H2BC12	0.179897	0.998088	0.131812	0.793862
PSME3	0.180037	0.998088	0.149729	0.803977
UBE2N	0.180125	0.998088	0.371667	0.868921
IMPDH2	0.180163	0.998088	0.777743	0.961637
EIF2S1	0.180203	0.998088	0.239835	0.849901
SLIT1	0.180299	0.998088	0.798992	0.968915
RTKN	0.180306	0.998088	0.108188	0.780001
ITGAM	0.180313	0.998088	0.23869	0.849901
MFRP	0.180367	0.998088	0.432747	0.886952
SRGN	0.180514	0.998088	0.576075	0.917338
TALDO1	0.180521	0.998088	0.342739	0.866131
MAP2K6	0.180956	0.998088	0.168995	0.822269
QPCT	0.181221	0.998088	0.448745	0.894193
HEBP1	0.181254	0.998088	0.374558	0.868921
IL17A	0.181279	0.998088	0.233094	0.849045
CX3CL1	0.181295	0.998088	0.169058	0.822269
NUDC	0.181311	0.998088	0.0488497	0.73847
DLG3	0.181339	0.998088	0.143078	0.80253
MID2	0.181355	0.998088	0.604024	0.921323
UQCRB	0.181447	0.998088	0.0268553	0.73847
HNRNPAB	0.181464	0.998088	0.281986	0.859875
MPIG6B	0.181594	0.998088	0.243622	0.849901
CSNK2A2	0.181641	0.998088	0.708245	0.943959
UTS2	0.181753	0.998088	0.0677012	0.744954
UFM1	0.182057	0.998088	0.385637	0.875221
FAM9B	0.182226	0.998088	0.16	0.808764
MMP1	0.182253	0.998088	0.094872	0.764481
COL6A5	0.182736	0.998088	0.540266	0.910232
ADGRG5	0.182742	0.998088	0.363476	0.866131
CAMK4	0.182827	0.998088	0.247172	0.849901
IL31RA	0.182829	0.998088	0.820602	0.972875
LTO1	0.18284	0.998088	0.0544591	0.73847
SGTA	0.182916	0.998088	0.296007	0.859875
ROCK2	0.182966	0.998088	0.0937062	0.763156
AKR1C4	0.183035	0.998088	0.194372	0.835636
RPS10	0.183037	0.998088	0.0695889	0.744954
IL1RAPL1	0.183288	0.998088	0.147449	0.802968
EIF5A2	0.183352	0.998088	0.316576	0.863917
ALG2	0.183548	0.998088	0.103198	0.777036
ADAM32	0.183898	0.998088	0.207429	0.838932
HSPA9	0.183899	0.998088	0.271546	0.859875
NDUFB6	0.18395	0.998088	0.0193886	0.73847
DOK1	0.18416	0.998088	0.0799899	0.750258
RNF25	0.184347	0.998088	0.201165	0.838932
REEP2	0.184507	0.998088	0.232401	0.849045
JUND	0.184813	0.998088	0.377269	0.8705
PTPN11	0.184881	0.998088	0.602073	0.921323
C19orf18	0.184902	0.998088	0.529105	0.910232
FER	0.185614	0.998088	0.0998745	0.769043
ANXA2	0.185651	0.998088	0.124495	0.793862
CLSTN1	0.185745	0.998088	0.14755	0.802968
PGLYRP3	0.185865	0.998088	0.00758928	0.73847
CA1	0.185973	0.998088	0.466038	0.895989
NABP1	0.186081	0.998088	0.282541	0.859875
GXYLT1	0.186135	0.998088	0.0889933	0.759078
SSB	0.186187	0.998088	0.089684	0.759078
ASIP	0.186216	0.998088	0.27238	0.859875
ENDOU	0.186288	0.998088	0.164161	0.814899
SNX27	0.186588	0.998088	0.200789	0.838932
GDF11	0.186672	0.998088	0.128805	0.793862
PAPOLG	0.186773	0.998088	0.0440357	0.73847
DNAJA2	0.187194	0.998088	0.0537525	0.73847
PAK5	0.187315	0.998088	0.0690643	0.744954
RAB7A	0.187351	0.998088	0.312674	0.861595
KIR2DL4	0.187483	0.998088	0.106567	0.779929
KLKB1	0.187522	0.998088	0.193682	0.835636
BST1	0.187726	0.998088	0.698336	0.94036
CPE	0.187937	0.998088	0.0334159	0.73847
ENO1	0.187996	0.998088	0.162637	0.814899
APOA1	0.188275	0.998088	0.135199	0.794732
ALOX15B	0.18829	0.998088	0.0701773	0.744954
C17orf78	0.188478	0.998088	0.309193	0.859875
SLC26A11	0.188578	0.998088	0.502898	0.904373
ACBD6	0.18871	0.998088	0.34129	0.866131
SAT2	0.188843	0.998088	0.0780426	0.749477
GFRA1	0.189348	0.998088	0.650788	0.931904
NUDT3	0.189578	0.998088	0.0906444	0.759078
NRGN	0.189664	0.998088	0.170646	0.822269
CREB3L1	0.189798	0.998088	0.186454	0.833497
SNRPB2	0.189943	0.998088	0.0922743	0.759078
METAP1	0.190353	0.998088	0.107582	0.779929
FBLN1	0.190501	0.998088	0.577315	0.917338
FCRL4	0.190538	0.998088	0.129328	0.793862
CREG1	0.1906	0.998088	0.422801	0.884478
MACROD1	0.190602	0.998088	0.0461093	0.73847
PPCDC	0.190617	0.998088	0.25175	0.849901
BAG6	0.19073	0.998088	0.460378	0.895989
SLC14A2	0.190733	0.998088	0.236592	0.849901
CCNA1	0.19107	0.998088	0.138053	0.795734
LYSMD3	0.191107	0.998088	0.26569	0.857524
ADCYAP1	0.191252	0.998088	0.0533824	0.73847
CD5L	0.191694	0.998088	0.476576	0.895989
GLTPD2	0.191701	0.998088	0.225474	0.84427
HENMT1	0.19172	0.998088	0.133451	0.793862
C1QTNF4	0.191905	0.998088	0.691753	0.938997
POFUT1	0.192025	0.998088	0.996656	0.999897
MESD	0.192088	0.998088	0.126636	0.793862
ACAP2	0.192155	0.998088	0.163001	0.814899
RAB2A	0.192383	0.998088	0.330837	0.866101
F5	0.192529	0.998088	0.12786	0.793862
IFNAR1	0.192706	0.998088	0.183405	0.831884
BCL6	0.193051	0.998088	0.461399	0.895989
EIF3B	0.193225	0.998088	0.287564	0.859875
SEMA5A	0.193822	0.998088	0.249459	0.849901
OTC	0.194027	0.998088	0.320707	0.864497
SNCA	0.194302	0.998088	0.576522	0.917338
ZNF18	0.194531	0.998088	0.0812824	0.750258
MAGEA6	0.194534	0.998088	0.504296	0.904926
VLDLR	0.194536	0.998088	0.0490632	0.73847
NT5C3A	0.19462	0.998088	0.0099931	0.73847
WNK1	0.194739	0.998088	0.218007	0.843543
IL10RA	0.194792	0.998088	0.169524	0.822269
SCG5	0.194832	0.998088	0.103646	0.777241
FAM172A	0.194864	0.998088	0.0725752	0.745109
BMP3	0.194865	0.998088	0.0975035	0.769043
MAP3K11	0.194897	0.998088	0.717933	0.946832
ARHGAP45	0.194941	0.998088	0.247627	0.849901
USF1	0.194991	0.998088	0.806346	0.969301
IFNA10	0.195049	0.998088	0.129981	0.793862
RBP7	0.195176	0.998088	0.267486	0.859875
MRM2	0.195238	0.998088	0.132083	0.793862
NIPAL4	0.195344	0.998088	0.176621	0.824201
PSMA1	0.195441	0.998088	0.0481591	0.73847
EPS8L3	0.195455	0.998088	0.238035	0.849901
TFPI	0.195531	0.998088	0.33814	0.866131
ASGR2	0.195566	0.998088	0.137445	0.795734
CPLX3	0.195708	0.998088	0.0674657	0.744954
SEMA5B	0.195831	0.998088	0.537866	0.910232
UCHL1	0.195919	0.998088	0.0877721	0.759078
SCGB1D1	0.196076	0.998088	0.0985661	0.769043
FUT3	0.196237	0.998088	0.173905	0.822269
NGF	0.196386	0.998088	0.00367403	0.73847
CD200R1	0.196451	0.998088	0.375246	0.869574
NTAQ1	0.196512	0.998088	0.0509143	0.73847
AMH	0.196566	0.998088	0.0944619	0.764481
RFXAP	0.196587	0.998088	0.301829	0.859875
ACBD4	0.196801	0.998088	0.0335452	0.73847
WFDC11	0.196854	0.998088	0.29444	0.859875
RBM24	0.196892	0.998088	0.0871209	0.759078
ERH	0.197511	0.998088	0.261402	0.857524
MRPL2	0.197789	0.998088	0.802276	0.969024
CD209	0.197823	0.998088	0.0758873	0.749477
TATDN3	0.197965	0.998088	0.107945	0.779929
BMPR1A	0.198019	0.998088	0.0861659	0.759078
ANAPC10	0.198062	0.998088	0.358158	0.866131
FAM151B	0.198167	0.998088	0.0598518	0.743579
AP1AR	0.198172	0.998088	0.904959	0.986198
PTN	0.198491	0.998088	0.843292	0.975903
GCLM	0.198549	0.998088	0.528522	0.910232
RACGAP1	0.198557	0.998088	0.0746716	0.749477
SLC25A18	0.198596	0.998088	0.0776644	0.749477
NTN1	0.199136	0.998088	0.152924	0.803977
ALPG	0.199417	0.998088	0.0897456	0.759078
IL1R2	0.199463	0.998088	0.199194	0.838932
CD300E	0.199871	0.998088	0.91617	0.987279
PLEKHA7	0.200344	0.998088	0.317517	0.863983
NEURL4	0.200429	0.998088	0.629487	0.925251
MTMR1	0.200822	0.998088	0.0802667	0.750258
CACNB4	0.20108	0.998088	0.289109	0.859875
TMCC3	0.201205	0.998088	0.04209	0.73847
DMBT1	0.201326	0.998088	0.189796	0.834896
IL17B	0.201412	0.998088	0.311169	0.859875
TOMM20L	0.20153	0.998088	0.0488581	0.73847
UBL4A	0.201616	0.998088	0.408619	0.884414
A4GNT	0.201645	0.998088	0.18549	0.832862
PFKFB3	0.202057	0.998088	0.148329	0.803977
SLC5A5	0.202078	0.998088	0.152794	0.803977
GUK1	0.202097	0.998088	0.694153	0.93978
DSCAML1	0.202136	0.998088	0.0301429	0.73847
EEF1AKMT1	0.202206	0.998088	0.0912921	0.759078
RHOA	0.202469	0.998088	0.235387	0.849374
OSBPL1A	0.202602	0.998088	0.258602	0.854845
DARS1	0.202868	0.998088	0.351415	0.866131
SVEP1	0.203037	0.998088	0.0704654	0.744954
QSOX1	0.203147	0.998088	0.425461	0.884478
DNM1	0.203359	0.998088	0.0512894	0.73847
RPL12	0.203474	0.998088	0.404732	0.882126
CT45A3	0.203523	0.998088	0.209941	0.838932
ARL8A	0.203541	0.998088	0.0896721	0.759078
PNLIPRP1	0.203562	0.998088	0.366308	0.867171
CDH1	0.203574	0.998088	0.109122	0.780618
MAPRE1	0.20358	0.998088	0.386035	0.875221
NCL	0.203757	0.998088	0.189792	0.834896
PAK4	0.204345	0.998088	0.0841487	0.757235
BAMBI	0.204571	0.998088	0.0523354	0.73847
F11R	0.204664	0.998088	0.471621	0.895989
SIGLEC12	0.204703	0.998088	0.244016	0.849901
TAFA3	0.204765	0.998088	0.205466	0.838932
SPINK5	0.204888	0.998088	0.559237	0.910946
MYZAP	0.20492	0.998088	0.555238	0.910738
C1GALT1	0.205065	0.998088	0.214959	0.84275
PCK1	0.205638	0.998088	0.0383082	0.73847
FGR	0.20607	0.998088	0.16969	0.822269
ITIH1	0.206321	0.998088	0.164677	0.814899
GFRA2	0.206404	0.998088	0.292744	0.859875
GUCA2B	0.206453	0.998088	0.206115	0.838932
SLC6A14	0.206476	0.998088	0.00274845	0.73847
RLN3	0.20649	0.998088	0.854767	0.976096
CD1A	0.206524	0.998088	0.294659	0.859875
AKR1C1	0.206799	0.998088	0.0262487	0.73847
ITGA6	0.206804	0.998088	0.0774472	0.749477
HGS	0.207042	0.998088	0.347436	0.866131
PADI4	0.207171	0.998088	0.338311	0.866131
RAB8B	0.207253	0.998088	0.120219	0.790179
SBDS	0.207447	0.998088	0.124769	0.793862
CBLN2	0.207528	0.998088	0.487834	0.900623
APEX2	0.20764	0.998088	0.992006	0.99872
HES6	0.207716	0.998088	0.0396648	0.73847
SEZ6L2	0.208095	0.998088	0.415385	0.884478
MDK	0.20858	0.998088	0.0374436	0.73847
PRSS1	0.208635	0.998088	0.439513	0.888165
HAGH	0.208671	0.998088	0.349892	0.866131
C1QTNF9	0.208709	0.998088	0.0705281	0.744954
SND1	0.208716	0.998088	0.0769705	0.749477
HIRIP3	0.209245	0.998088	0.00740021	0.73847
FAM189A2	0.209731	0.998088	0.357994	0.866131
ANXA1	0.209751	0.998088	0.0721384	0.745109
KYAT1	0.209792	0.998088	0.015088	0.73847
BPI	0.20982	0.998088	0.119671	0.790179
PSMB2	0.209988	0.998088	0.382134	0.872677
CLPP	0.209989	0.998088	0.35581	0.866131
ALDOB	0.210003	0.998088	0.598263	0.921153
GNS	0.210013	0.998088	0.276357	0.859875
PTP4A1	0.210113	0.998088	0.0447581	0.73847
COPB2	0.210119	0.998088	0.389284	0.876645
FOXM1	0.210306	0.998088	0.36813	0.867642
NT5C2	0.210452	0.998088	0.453461	0.895356
CCDC92	0.210533	0.998088	0.00318976	0.73847
PRPF19	0.210587	0.998088	0.99973	0.999922
NIP7	0.21081	0.998088	0.18948	0.834896
SDHB	0.211093	0.998088	0.675728	0.936683
MOB4	0.211216	0.998088	0.732168	0.947613
WDR48	0.211322	0.998088	0.156957	0.807645
UBQLN2	0.211329	0.998088	0.963177	0.992948
RAC1	0.211386	0.998088	0.336376	0.866131
MST1	0.211548	0.998088	0.145931	0.80253
DHODH	0.211766	0.998088	0.514489	0.908741
SHISAL1	0.211886	0.998088	0.00722014	0.73847
LYG2	0.211903	0.998088	0.19364	0.835636
SULT6B1	0.212154	0.998088	0.252212	0.849901
FAM171B	0.212278	0.998088	0.795628	0.967846
PLEKHO2	0.212293	0.998088	0.281501	0.859875
SOSTDC1	0.212382	0.998088	0.102253	0.772884
FETUB	0.212483	0.998088	0.424148	0.884478
TCF21	0.21251	0.998088	0.0291247	0.73847
ITGB2	0.212578	0.998088	0.0602279	0.743579
ADM2	0.212592	0.998088	0.113597	0.786952
SCARF2	0.212666	0.998088	0.412377	0.884478
ABHD12	0.2128	0.998088	0.106131	0.779929
TLE5	0.213231	0.998088	0.108708	0.780618
FCGR1A	0.213443	0.998088	0.101729	0.772441
PXDN	0.213455	0.998088	0.367097	0.867642
ZYX	0.213889	0.998088	0.766911	0.95898
EIF4EBP1	0.213894	0.998088	0.471678	0.895989
STAT3	0.21391	0.998088	0.804216	0.969024
AMOT	0.213954	0.998088	0.304943	0.859875
ANKRD40	0.214679	0.998088	0.0859075	0.759078
BGN	0.214702	0.998088	0.408279	0.884414
PDLIM1	0.214706	0.998088	0.173854	0.822269
CSK	0.214754	0.998088	0.204261	0.838932
EMC1	0.215011	0.998088	0.221349	0.84427
SEPTIN6	0.215128	0.998088	0.430131	0.885157
USP10	0.215225	0.998088	0.297375	0.859875
NUDT7	0.215242	0.998088	0.640349	0.928729
C22orf15	0.215657	0.998088	0.057209	0.73847
TMUB1	0.215676	0.998088	0.067426	0.744954
PTK2B	0.215746	0.998088	0.147075	0.802968
TIMP2	0.216017	0.998088	0.135502	0.795168
KERA	0.216018	0.998088	0.322816	0.864497
PDE4D	0.216077	0.998088	0.565504	0.912646
FBLN7	0.21622	0.998088	0.101863	0.772571
FABP3	0.216365	0.998088	0.139211	0.795734
UBE2C	0.2169	0.998088	0.242798	0.849901
SYF2	0.217058	0.998088	0.197273	0.837917
GLS	0.217105	0.998088	0.582987	0.918164
NIPSNAP3B	0.217158	0.998088	0.817267	0.972357
PDGFRL	0.217365	0.998088	0.297689	0.859875
CA10	0.217432	0.998088	0.179025	0.825001
ST6GALNAC1	0.217685	0.998088	0.0316031	0.73847
C4A	0.217754	0.998088	0.0373684	0.73847
KLK3	0.217764	0.998088	0.284724	0.859875
DHH	0.217923	0.998088	0.214488	0.84177
CTBP1	0.218058	0.998088	0.223376	0.84427
TBXAS1	0.218134	0.998088	0.426656	0.884478
HTR2A	0.218148	0.998088	0.217386	0.843543
SPINK8	0.218216	0.998088	0.101122	0.770999
H3C1	0.218409	0.998088	0.309929	0.859875
HMBS	0.218551	0.998088	0.405966	0.882776
EIF1	0.218951	0.998088	0.738242	0.949373
BCAN	0.218991	0.998088	0.645742	0.929744
TSG101	0.219119	0.998088	0.422816	0.884478
CEBPG	0.219276	0.998088	0.476987	0.895989
ANKRD16	0.219314	0.998088	0.0561568	0.73847
KIR3DL3	0.219319	0.998088	0.909886	0.986198
TMED10	0.219748	0.998088	0.0827793	0.752124
NAPA	0.220048	0.998088	0.621009	0.924066
CRYL1	0.220165	0.998088	0.0988545	0.769043
GPR26	0.220345	0.998088	0.041264	0.73847
FBXO3	0.220538	0.998088	0.0446824	0.73847
ATP5F1B	0.220543	0.998088	0.931704	0.98896
QTRT2	0.220619	0.998088	0.056364	0.73847
ERLIN1	0.22069	0.998088	0.0289715	0.73847
AP2A2	0.220728	0.998088	0.490303	0.901129
FUT10	0.220752	0.998088	0.437744	0.888144
RAB32	0.220778	0.998088	0.250955	0.849901
BCL7A	0.220885	0.998088	0.165536	0.814899
APOA5	0.22096	0.998088	0.303339	0.859875
DNAJB14	0.221102	0.998088	0.889115	0.981881
MGMT	0.221138	0.998088	0.400925	0.88139
DPYSL4	0.221214	0.998088	0.0140546	0.73847
FAM89B	0.221295	0.998088	0.0286773	0.73847
KIRREL3	0.221436	0.998088	0.986593	0.997957
CREBZF	0.221458	0.998088	0.224325	0.84427
SPTLC2	0.221469	0.998088	0.194887	0.835636
GDI1	0.2215	0.998088	0.867337	0.976676
SYT2	0.221589	0.998088	0.603051	0.921323
GPR135	0.221718	0.998088	0.264644	0.857524
CD36	0.221722	0.998088	0.367751	0.867642
CFAP36	0.221754	0.998088	0.207714	0.838932
UBE2D1	0.221771	0.998088	0.457115	0.895989
VIT	0.222001	0.998088	0.287536	0.859875
ERBB3	0.22235	0.998088	0.20424	0.838932
CTNNA1	0.222396	0.998088	0.684712	0.938309
PUS1	0.22269	0.998088	0.0522792	0.73847
MMP13	0.222721	0.998088	0.164937	0.814899
SAP30L	0.222808	0.998088	0.426122	0.884478
NPEPL1	0.222909	0.998088	0.163206	0.814899
SEMA4C	0.222946	0.998088	0.928724	0.987847
TMEM38B	0.222979	0.998088	0.309918	0.859875
KCNE5	0.223095	0.998088	0.903322	0.985529
SVBP	0.223237	0.998088	0.380164	0.872079
CSNK2A1	0.223275	0.998088	0.84456	0.975903
RHOT1	0.223286	0.998088	0.100126	0.769043
PSMA5	0.223345	0.998088	0.203708	0.838932
NGFR	0.223484	0.998088	0.2923	0.859875
VAV1	0.223646	0.998088	0.231128	0.848631
XYLB	0.223707	0.998088	0.786709	0.964238
CPLX2	0.22397	0.998088	0.589124	0.919919
CDK5RAP3	0.224264	0.998088	0.925811	0.987579
COA7	0.224317	0.998088	0.685786	0.93835
MYL9	0.224356	0.998088	0.17124	0.822269
PLEKHA1	0.224487	0.998088	0.0183485	0.73847
C1orf210	0.2246	0.998088	0.275186	0.859875
NHEJ1	0.224615	0.998088	0.0671713	0.744954
MBNL1	0.224733	0.998088	0.398319	0.879536
TNS2	0.224941	0.998088	0.0988506	0.769043
NARS1	0.225069	0.998088	0.214571	0.84177
CHRDL1	0.225143	0.998088	0.459277	0.895989
SEL1L2	0.225322	0.998088	0.0637053	0.744954
ATF6B	0.225673	0.998088	0.486239	0.900089
PRKCG	0.225831	0.998088	0.221381	0.84427
TICAM2	0.225927	0.998088	0.176216	0.824201
RFPL3	0.22606	0.998088	0.0446652	0.73847
CD177	0.226082	0.998088	0.209908	0.838932
CD74	0.226201	0.998088	0.844306	0.975903
FKBP4	0.226421	0.998088	0.824992	0.973571
NPM2	0.226799	0.998088	0.191677	0.834964
COL5A1	0.226842	0.998088	0.5999	0.921323
BLOC1S5	0.226954	0.998088	0.111644	0.783432
FZD10	0.22703	0.998088	0.125371	0.793862
DUSP28	0.227099	0.998088	0.334568	0.866131
ATF6	0.227221	0.998088	0.290592	0.859875
NLGN4Y	0.227254	0.998088	0.179286	0.825001
DTD1	0.227418	0.998088	0.270116	0.859875
MMP16	0.227464	0.998088	0.135086	0.794705
FLNA	0.227717	0.998088	0.541893	0.910232
PFN1	0.227739	0.998088	0.234082	0.849045
CA9	0.228009	0.998088	0.0678005	0.744954
INHBA	0.228246	0.998088	0.0501592	0.73847
CD209	0.228497	0.998088	0.0755354	0.749477
RAB1B	0.228564	0.998088	0.623498	0.924655
RBBP4	0.22866	0.998088	0.0570732	0.73847
INHBC	0.228825	0.998088	0.230939	0.848444
HS3ST3B1	0.228859	0.998088	0.403513	0.881998
ITGA2	0.229405	0.998088	0.99456	0.999287
DPP8	0.229564	0.998088	0.677171	0.936683
PSG11	0.229658	0.998088	0.0485278	0.73847
DDX1	0.229758	0.998088	0.427886	0.884556
PAXIP1	0.22988	0.998088	0.0557675	0.73847
TTC33	0.23016	0.998088	0.0298047	0.73847
YBX1	0.230194	0.998088	0.490372	0.901129
ABO	0.230379	0.998088	0.361223	0.866131
TMEM119	0.23043	0.998088	0.0499562	0.73847
GGT2	0.230551	0.998088	0.741304	0.950794
NT5C1A	0.230583	0.998088	0.0560754	0.73847
ACVRL1	0.230769	0.998088	0.540388	0.910232
GCKR	0.230819	0.998088	0.0372154	0.73847
BAD	0.2313	0.998088	0.536452	0.910232
APEX1	0.231368	0.998088	0.19542	0.835636
PGAM2	0.231484	0.998088	0.146709	0.802968
RRM1	0.231648	0.998088	0.313482	0.861624
PDE5A	0.231737	0.998088	0.187486	0.833813
MDM2	0.231752	0.998088	0.301873	0.859875
NDUFAF2	0.231772	0.998088	0.228691	0.844578
SCP2D1	0.231772	0.998088	0.848321	0.976096
CFHR3	0.231892	0.998088	0.547884	0.910232
BDNF	0.231909	0.998088	0.207211	0.838932
JARID2	0.232036	0.998088	0.133139	0.793862
ZCCHC18	0.232151	0.998088	0.376528	0.870172
S100A10	0.232217	0.998088	0.0768149	0.749477
STUB1	0.232368	0.998088	0.305482	0.859875
LILRA4	0.232848	0.998088	0.838169	0.974699
ZNF275	0.233035	0.998088	0.999922	0.999922
NT5DC1	0.233198	0.998088	0.163313	0.814899
WFDC8	0.233556	0.998088	0.112519	0.784587
RAB26	0.233694	0.998088	0.723213	0.947613
IQCF3	0.234069	0.998088	0.0320878	0.73847
PGRMC2	0.234138	0.998088	0.0298004	0.73847
ARAF	0.234194	0.998088	0.140825	0.796006
CELF2	0.234218	0.998088	0.461351	0.895989
PPIH	0.234301	0.998088	0.710222	0.945011
PRMT1	0.234334	0.998088	0.14719	0.802968
NCAN	0.234406	0.998088	0.328421	0.865339
ACSS2	0.234457	0.998088	0.0775513	0.749477
FAH	0.234548	0.998088	0.329583	0.865339
HHEX	0.234825	0.998088	0.0402577	0.73847
GNG12	0.234983	0.998088	0.650321	0.931904
CHTF8	0.235073	0.998088	0.292604	0.859875
NMES1	0.235122	0.998088	0.234194	0.849045
RORB	0.235466	0.998088	0.522662	0.910232
C1QTNF4	0.235579	0.998088	0.664333	0.934089
ADGRG1	0.235686	0.998088	0.440704	0.888601
STAT3	0.235853	0.998088	0.496032	0.903631
NTRK2	0.235862	0.998088	0.665169	0.93465
FAM177A1	0.236175	0.998088	0.202592	0.838932
CBR1	0.23636	0.998088	0.205854	0.838932
FGF8	0.236938	0.998088	0.0527461	0.73847
QSOX2	0.237035	0.998088	0.297614	0.859875
ACP2	0.237052	0.998088	0.152399	0.803977
CDC34	0.237332	0.998088	0.287584	0.859875
LRRTM4	0.237353	0.998088	0.134591	0.794675
POLR2C	0.237382	0.998088	0.0898201	0.759078
CRYGD	0.237495	0.998088	0.609579	0.921811
GAS2	0.2378	0.998088	0.143729	0.80253
None	0.238145	0.998088	0.0698439	0.744954
MAPRE1	0.238176	0.998088	0.305309	0.859875
LMAN1	0.238413	0.998088	0.205946	0.838932
PMEPA1	0.239004	0.998088	0.154863	0.807645
MAPRE2	0.239223	0.998088	0.607963	0.921323
CHST3	0.23937	0.998088	0.130667	0.793862
ATP5PF	0.23983	0.998088	0.667098	0.934683
YARS1	0.239839	0.998088	0.446819	0.894193
MPP2	0.24024	0.998088	0.115034	0.786952
EEF1A1	0.240424	0.998088	0.234329	0.849045
MANF	0.240551	0.998088	0.339272	0.866131
CTDSP1	0.240659	0.998088	0.143437	0.80253
VASN	0.240858	0.998088	0.222303	0.84427
TPD52L2	0.240988	0.998088	0.236864	0.849901
NAP1L1	0.241113	0.998088	0.469899	0.895989
GPHA2	0.241115	0.998088	0.622299	0.924148
ENTPD2	0.241217	0.998088	0.497705	0.903631
NT5C3B	0.241392	0.998088	0.36338	0.866131
TNFAIP1	0.241401	0.998088	0.381456	0.872264
FTH1	0.241774	0.998088	0.357612	0.866131
NXPH1	0.241809	0.998088	0.418554	0.884478
UPB1	0.242043	0.998088	0.150493	0.803977
THBS3	0.242139	0.998088	0.601148	0.921323
CYP3A4	0.242194	0.998088	0.119677	0.790179
CHKB	0.24243	0.998088	0.470381	0.895989
ALPI	0.242659	0.998088	0.0418276	0.73847
SPINK6	0.242746	0.998088	0.424729	0.884478
IL20RA	0.242897	0.998088	0.0158435	0.73847
NAA50	0.243067	0.998088	0.570215	0.915505
VASP	0.243228	0.998088	0.265209	0.857524
SMC3	0.24338	0.998088	0.136715	0.795399
NIF3L1	0.243436	0.998088	0.356396	0.866131
NAGLU	0.243491	0.998088	0.341328	0.866131
CA8	0.243565	0.998088	0.0466895	0.73847
ITGA5	0.243863	0.998088	0.159978	0.808764
RIPK1	0.243959	0.998088	0.0640433	0.744954
ABCC6	0.244094	0.998088	0.0255268	0.73847
PSMA1	0.244221	0.998088	0.358611	0.866131
PFDN1	0.244537	0.998088	0.396155	0.878824
FXN	0.244557	0.998088	0.0888239	0.759078
PPP1R14A	0.244624	0.998088	0.0132881	0.73847
TNFSF11	0.244629	0.998088	0.140481	0.796006
SELENOM	0.244708	0.998088	0.826493	0.973571
OCRL	0.244719	0.998088	0.32328	0.864497
CAV3	0.244763	0.998088	0.1485	0.803977
S100A12	0.244812	0.998088	0.129377	0.793862
TGFB2	0.245047	0.998088	0.486725	0.900212
ZC3H8	0.245242	0.998088	0.727715	0.947613
UBA6	0.245317	0.998088	0.281027	0.859875
G0S2	0.245412	0.998088	0.0782899	0.750258
EXD1	0.245475	0.998088	0.46197	0.895989
ZFAND1	0.245505	0.998088	0.628801	0.925251
CADM3	0.245571	0.998088	0.552283	0.910738
CTRC	0.245839	0.998088	0.121181	0.790179
TPM3	0.245868	0.998088	0.30438	0.859875
LYPD1	0.246165	0.998088	0.229009	0.844578
TMPRSS15	0.246433	0.998088	0.232825	0.849045
KIN	0.246607	0.998088	0.208819	0.838932
KAT2B	0.246612	0.998088	0.0420936	0.73847
EIF4B	0.246786	0.998088	0.545519	0.910232
N4BP2L2	0.246856	0.998088	0.112914	0.784587
PLEK	0.246894	0.998088	0.197587	0.837917
YWHAB	0.247132	0.998088	0.373648	0.868921
NCK1	0.247229	0.998088	0.259462	0.854981
IGFBP5	0.247295	0.998088	0.107941	0.779929
CFHR5	0.247307	0.998088	0.264098	0.857524
SLITRK1	0.24736	0.998088	0.689223	0.938842
AMT	0.247414	0.998088	0.421205	0.884478
S100A14	0.247581	0.998088	0.0568804	0.73847
FAF2	0.247666	0.998088	0.441809	0.889353
MUTYH	0.247849	0.998088	0.449773	0.894351
FLT3	0.247871	0.998088	0.0343185	0.73847
NELFE	0.248008	0.998088	0.858801	0.976644
UBE2C	0.248097	0.998088	0.129692	0.793862
ILK	0.248134	0.998088	0.157437	0.807645
HK3	0.248223	0.998088	0.130674	0.793862
TAX1BP1	0.248419	0.998088	0.226612	0.84427
OLFM4	0.24852	0.998088	0.816188	0.971774
IRF1	0.248567	0.998088	0.540445	0.910232
PDZK1	0.248756	0.998088	0.474944	0.895989
RPS20	0.248759	0.998088	0.545885	0.910232
CDH13	0.248787	0.998088	0.659212	0.933251
GTPBP10	0.248854	0.998088	0.0466243	0.73847
TERB2	0.249023	0.998088	0.363247	0.866131
ANXA4	0.24941	0.998088	0.105429	0.779929
UBE2L3	0.249792	0.998088	0.241672	0.849901
SULT1E1	0.249856	0.998088	0.325533	0.864624
METTL3	0.249858	0.998088	0.103063	0.776866
SYT4	0.249924	0.998088	0.78846	0.964492
WWP2	0.249973	0.998088	0.0190824	0.73847
ITGAV	0.250066	0.998088	0.0867705	0.759078
SARG	0.250096	0.998088	0.231635	0.848644
ETNK1	0.250156	0.998088	0.19296	0.834964
HJV	0.250192	0.998088	0.174489	0.822269
DKK4	0.250226	0.998088	0.18852	0.833813
SUOX	0.250277	0.998088	0.0251192	0.73847
USP4	0.250298	0.998088	0.280669	0.859875
SYK	0.250302	0.998088	0.817604	0.972357
CD74	0.250307	0.998088	0.0350781	0.73847
TNFRSF25	0.250517	0.998088	0.72697	0.947613
WNK3	0.250815	0.998088	0.688701	0.93865
MPZ	0.250822	0.998088	0.90604	0.986198
WFDC5	0.25094	0.998088	0.91532	0.987279
PKDCC	0.250992	0.998088	0.0495598	0.73847
FAIM	0.251082	0.998088	0.0619205	0.744343
ARF5	0.251187	0.998088	0.451372	0.895009
PRDX6	0.251272	0.998088	0.371855	0.868921
ASGR1	0.25158	0.998088	0.730798	0.947613
E2F5	0.252028	0.998088	0.215971	0.842815
FKBP14	0.252057	0.998088	0.530976	0.910232
USP8	0.252074	0.998088	0.285729	0.859875
ATAD1	0.252141	0.998088	0.335477	0.866131
CCDC97	0.252194	0.998088	0.480208	0.896808
IDH3G	0.252291	0.998088	0.506533	0.906042
S100A3	0.252369	0.998088	0.0476041	0.73847
NDRG2	0.252417	0.998088	0.188323	0.833813
TRIO	0.252541	0.998088	0.0558947	0.73847
RPS6KA3	0.252564	0.998088	0.409677	0.884414
H6PD	0.252601	0.998088	0.335244	0.866131
ENOX2	0.252761	0.998088	0.0322802	0.73847
UBE2V1	0.252799	0.998088	0.674524	0.936318
SLAMF6	0.2531	0.998088	0.226356	0.84427
SLC22A16	0.253172	0.998088	0.933958	0.989136
ADGRF5	0.253282	0.998088	0.0893021	0.759078
MAPK12	0.253397	0.998088	0.0379899	0.73847
POLI	0.253569	0.998088	0.0318792	0.73847
CFAP45	0.253778	0.998088	0.140321	0.796006
PSMC5	0.253939	0.998088	0.978536	0.996636
CCL7	0.253983	0.998088	0.05493	0.73847
CDC25A	0.253996	0.998088	0.5849	0.918164
CCN2	0.253998	0.998088	0.448619	0.894193
IGDCC4	0.254124	0.998088	0.792346	0.965788
CLIC2	0.254284	0.998088	0.495173	0.903597
CNMD	0.254293	0.998088	0.997233	0.999897
TPH1	0.25446	0.998088	0.017588	0.73847
UGP2	0.254561	0.998088	0.322941	0.864497
CABP5	0.254859	0.998088	0.46413	0.895989
SYTL1	0.254959	0.998088	0.0945363	0.764481
EEF1A1	0.25514	0.998088	0.0559545	0.73847
ATG4C	0.255572	0.998088	0.136875	0.795399
UCN3	0.255618	0.998088	0.120007	0.790179
PCDH8	0.256071	0.998088	0.106034	0.779929
SNX12	0.256083	0.998088	0.429852	0.885083
PPIG	0.256094	0.998088	0.0769306	0.749477
LIPK	0.256096	0.998088	0.0409813	0.73847
MSMB	0.256211	0.998088	0.605103	0.921323
AARS1	0.256237	0.998088	0.890965	0.981894
DCP1B	0.256339	0.998088	0.0278037	0.73847
CGB3	0.256554	0.998088	0.15994	0.808764
TIGIT	0.256654	0.998088	0.759317	0.95643
ACLY	0.256783	0.998088	0.604885	0.921323
ADAM17	0.256791	0.998088	0.607473	0.921323
HDAC4	0.256842	0.998088	0.386762	0.875221
MITD1	0.257033	0.998088	0.14704	0.802968
GNG11	0.25704	0.998088	0.0693792	0.744954
NREP	0.257282	0.998088	0.351419	0.866131
NRG1	0.257563	0.998088	0.676056	0.936683
PARP1	0.257715	0.998088	0.212181	0.838932
MSRB2	0.257723	0.998088	0.0697659	0.744954
ARHGAP22	0.258077	0.998088	0.501305	0.903631
GPX7	0.258213	0.998088	0.101026	0.770999
NMRAL1	0.258391	0.998088	0.285147	0.859875
TMIGD2	0.25862	0.998088	0.275927	0.859875
SDF2L1	0.258765	0.998088	0.588137	0.919919
CCL4L1	0.258799	0.998088	0.146706	0.802968
MAGOH	0.258986	0.998088	0.599122	0.921323
HYPK	0.259001	0.998088	0.372314	0.868921
ALK	0.259163	0.998088	0.918738	0.987279
FGF16	0.25945	0.998088	0.423221	0.884478
DUS2	0.259472	0.998088	0.0388026	0.73847
KLK9	0.259664	0.998088	0.574326	0.91563
MXRA8	0.25975	0.998088	0.0979201	0.769043
ST13	0.259787	0.998088	0.785612	0.964091
LEMD1	0.259815	0.998088	0.353918	0.866131
DGCR6	0.259926	0.998088	0.666418	0.934683
ANGPTL1	0.259961	0.998088	0.172507	0.822269
PPIE	0.260091	0.998088	0.0678593	0.744954
CLEC4G	0.260195	0.998088	0.167297	0.818955
ZNF134	0.260396	0.998088	0.244645	0.849901
PRR27	0.260561	0.998088	0.0308031	0.73847
MRPL1	0.260664	0.998088	0.124335	0.793862
CCL14	0.260731	0.998088	0.40344	0.881998
CPA4	0.26102	0.998088	0.683556	0.937862
PLA2G2E	0.261143	0.998088	0.908985	0.986198
PCBP3	0.261147	0.998088	0.150315	0.803977
COX7A2L	0.261188	0.998088	0.34929	0.866131
PRDX3	0.261273	0.998088	0.346041	0.866131
SFTPD	0.261385	0.998088	0.172767	0.822269
G6PD	0.26164	0.998088	0.339201	0.866131
FIG4	0.261683	0.998088	0.098055	0.769043
GUSB	0.261703	0.998088	0.764303	0.956649
CLEC11A	0.261973	0.998088	0.478495	0.895989
LMO3	0.262194	0.998088	0.133256	0.793862
LAD1	0.262265	0.998088	0.877162	0.979306
PLA1A	0.262427	0.998088	0.422564	0.884478
RAB38	0.262486	0.998088	0.243021	0.849901
USP1	0.262765	0.998088	0.33634	0.866131
PLPBP	0.262899	0.998088	0.732405	0.947613
THBS2	0.262914	0.998088	0.109859	0.781998
NAP1L4	0.263143	0.998088	0.612513	0.923361
RALYL	0.26319	0.998088	0.136045	0.795168
ROS1	0.263196	0.998088	0.0226885	0.73847
FBXL4	0.263343	0.998088	0.401304	0.881586
STMN2	0.263371	0.998088	0.886588	0.981326
SLITRK5	0.263414	0.998088	0.887219	0.981326
NUCB1	0.263441	0.998088	0.829478	0.973676
DCUN1D1	0.263573	0.998088	0.106597	0.779929
HMGA1	0.26364	0.998088	0.428111	0.884556
CFI	0.263925	0.998088	0.212153	0.838932
EIF1AY	0.264203	0.998088	0.521734	0.910232
SGSH	0.264513	0.998088	0.598394	0.92116
FRS2	0.264721	0.998088	0.536157	0.910232
BPHL	0.264922	0.998088	0.215255	0.84275
AGFG2	0.264933	0.998088	0.941945	0.990592
RER1	0.265031	0.998088	0.0849696	0.758988
EFNB1	0.265087	0.998088	0.176623	0.824201
ATP1B3	0.265363	0.998088	0.0862664	0.759078
HMGCS2	0.265445	0.998088	0.297584	0.859875
CDK1	0.265474	0.998088	0.0822566	0.750258
MAFG	0.265638	0.998088	0.322129	0.864497
SULT1A3	0.266011	0.998088	0.771716	0.959649
IGF2R	0.266015	0.998088	0.927229	0.987579
PSENEN	0.266255	0.998088	0.564916	0.912646
INSL4	0.266515	0.998088	0.624146	0.925251
PTPN4	0.266783	0.998088	0.52341	0.910232
SDCBP2	0.266973	0.998088	0.170142	0.822269
STX6	0.267078	0.998088	0.120875	0.790179
DDX39B	0.267406	0.998088	0.197571	0.837917
CTRB1	0.267659	0.998088	0.351048	0.866131
NVL	0.267949	0.998088	0.380002	0.872079
CALN1	0.267976	0.998088	0.570246	0.915505
EIF2S2	0.268033	0.998088	0.404156	0.882126
FGF7	0.268153	0.998088	0.180583	0.825001
HBA1	0.268203	0.998088	0.297146	0.859875
PZP	0.268308	0.998088	0.0881103	0.759078
SHANK1	0.268356	0.998088	0.293456	0.859875
SNX15	0.268668	0.998088	0.616136	0.923508
VSTM4	0.268756	0.998088	0.267513	0.859875
SERPINF1	0.269285	0.998088	0.317667	0.863983
CA4	0.269551	0.998088	0.225653	0.84427
CERT1	0.269798	0.998088	0.400904	0.88139
KPNA6	0.26995	0.998088	0.107759	0.779929
SCLY	0.270236	0.998088	0.520706	0.910015
TPO	0.27041	0.998088	0.12494	0.793862
GSTM1	0.271114	0.998088	0.330768	0.866101
CUZD1	0.271167	0.998088	0.0602981	0.743579
BMP3	0.271246	0.998088	0.0589707	0.741734
IL4	0.271289	0.998088	0.117812	0.790179
IL1RN	0.271382	0.998088	0.578613	0.917338
IFNA7	0.271409	0.998088	0.171846	0.822269
SNTA1	0.271413	0.998088	0.33523	0.866131
GPCPD1	0.271494	0.998088	0.245489	0.849901
ACVR1B	0.271579	0.998088	0.274308	0.859875
OXSM	0.271705	0.998088	0.666016	0.934683
RRAS	0.271877	0.998088	0.409517	0.884414
KCTD13	0.272059	0.998088	0.066369	0.744954
ENPP2	0.272069	0.998088	0.535603	0.910232
GABARAPL2	0.272169	0.998088	0.605535	0.921323
TFPI2	0.272538	0.998088	0.629284	0.925251
AVEN	0.272687	0.998088	0.314733	0.86335
P4HA2	0.27293	0.998088	0.511187	0.908741
GLCE	0.27301	0.998088	0.599326	0.921323
C4BPB	0.273049	0.998088	0.720339	0.947613
DHX58	0.273116	0.998088	0.385451	0.875221
THAP11	0.273313	0.998088	0.552861	0.910738
CCDC90B	0.273618	0.998088	0.980676	0.996636
COMMD7	0.273697	0.998088	0.241668	0.849901
S100A13	0.273702	0.998088	0.46451	0.895989
CXCL1	0.273773	0.998088	0.625178	0.925251
SUMF2	0.273935	0.998088	0.937324	0.989164
NNAT	0.273978	0.998088	0.0606737	0.743579
ERP29	0.274019	0.998088	0.303028	0.859875
NRAC	0.274032	0.998088	0.0593693	0.742269
ESAM	0.274042	0.998088	0.239107	0.849901
PDCD6IP	0.274327	0.998088	0.57304	0.915505
UBB	0.274533	0.998088	0.608927	0.921323
PIK3C2A	0.274585	0.998088	0.242432	0.849901
HCLS1	0.274628	0.998088	0.380733	0.872145
CR2	0.274769	0.998088	0.988884	0.998434
DMTN	0.274892	0.998088	0.1589	0.808201
TWF1	0.274901	0.998088	0.136385	0.79529
FKBP3	0.275007	0.998088	0.299403	0.859875
LSP1	0.275121	0.998088	0.364764	0.866131
DNALI1	0.275293	0.998088	0.151887	0.803977
TEC	0.275298	0.998088	0.15109	0.803977
CDK20	0.275752	0.998088	0.0805389	0.750258
FGFR4	0.275833	0.998088	0.071136	0.744954
FTL	0.275852	0.998088	0.415306	0.884478
EGLN3	0.275917	0.998088	0.128174	0.793862
ANXA6	0.276376	0.998088	0.582767	0.918164
STIP1	0.276676	0.998088	0.464698	0.895989
PDGFA	0.276737	0.998088	0.293555	0.859875
GNAI1	0.276763	0.998088	0.615466	0.923361
REPS2	0.277062	0.998088	0.331945	0.866131
ECE1	0.277898	0.998088	0.0669249	0.744954
PDCD1	0.278439	0.998088	0.184902	0.832862
H2BU1	0.278818	0.998088	0.221877	0.84427
CLEC4C	0.278927	0.998088	0.916321	0.987279
PSMC3IP	0.279186	0.998088	0.224728	0.84427
IL12A	0.279243	0.998088	0.31097	0.859875
ZNF593	0.279262	0.998088	0.234467	0.849045
PLXNA1	0.279768	0.998088	0.615056	0.923361
CAPN2	0.279786	0.998088	0.557373	0.910738
DEPP1	0.280199	0.998088	0.900082	0.98509
AIMP1	0.280664	0.998088	0.18423	0.832862
AACS	0.280682	0.998088	0.195313	0.835636
B4GALT7	0.280742	0.998088	0.219585	0.84427
MBNL2	0.280847	0.998088	0.407334	0.88288
MPL	0.280893	0.998088	0.897022	0.984629
VPS4A	0.281122	0.998088	0.677235	0.936683
FGF3	0.281311	0.998088	0.682876	0.937862
LRRC4B	0.281348	0.998088	0.0246054	0.73847
LRFN5	0.281524	0.998088	0.0498346	0.73847
CAVIN1	0.281596	0.998088	0.042869	0.73847
SCFD1	0.28161	0.998088	0.80977	0.970001
RAET1L	0.281644	0.998088	0.228846	0.844578
BTN1A1	0.28165	0.998088	0.557571	0.910738
LAS2	0.281715	0.998088	0.109628	0.781963
ID1	0.281838	0.998088	0.178431	0.825001
CDH15	0.281918	0.998088	0.596284	0.921153
XPNPEP1	0.282118	0.998088	0.887566	0.981412
PSMB5	0.282218	0.998088	0.144921	0.80253
ANG	0.282386	0.998088	0.226144	0.84427
DHX9	0.282432	0.998088	0.0446526	0.73847
PDGFRA	0.282773	0.998088	0.179499	0.825001
GCDH	0.28306	0.998088	0.239696	0.849901
AIDA	0.283134	0.998088	0.601553	0.921323
LPL	0.283152	0.998088	0.652585	0.931904
IL1RAPL2	0.283493	0.998088	0.0925637	0.759078
CD200R1L	0.283511	0.998088	0.334919	0.866131
KLK14	0.283537	0.998088	0.807058	0.969301
PRRX1	0.283545	0.998088	0.453502	0.895356
VCAM1	0.28364	0.998088	0.217821	0.843543
SRY	0.283691	0.998088	0.170699	0.822269
KIR3DL2	0.283846	0.998088	0.0462253	0.73847
ST3GAL6	0.283881	0.998088	0.39728	0.879106
ARPP19	0.283993	0.998088	0.0675008	0.744954
HSPB3	0.284205	0.998088	0.0669117	0.744954
CDKN2D	0.284226	0.998088	0.68895	0.93865
MEPE	0.284407	0.998088	0.764404	0.956649
RAET1G	0.284462	0.998088	0.32985	0.865339
PABPN1	0.284907	0.998088	0.258717	0.854845
POTEM	0.284918	0.998088	0.390034	0.876645
SARS1	0.285001	0.998088	0.628453	0.925251
CCN4	0.28512	0.998088	0.594577	0.920793
PCOLCE2	0.285271	0.998088	0.73616	0.948872
FGF4	0.285432	0.998088	0.0644055	0.744954
PI3	0.285563	0.998088	0.0577539	0.739709
LGR5	0.285575	0.998088	0.0110035	0.73847
VILL	0.285596	0.998088	0.0374196	0.73847
ALDH5A1	0.285808	0.998088	0.131863	0.793862
PMVK	0.285945	0.998088	0.0678674	0.744954
CLEC7A	0.285967	0.998088	0.297306	0.859875
FGF12	0.286015	0.998088	0.252113	0.849901
IL2RA	0.286271	0.998088	0.460331	0.895989
TCN2	0.286401	0.998088	0.344182	0.866131
KEL	0.286656	0.998088	0.100052	0.769043
NEU1	0.286707	0.998088	0.464213	0.895989
TLR1	0.287286	0.998088	0.059533	0.743042
VWF	0.287337	0.998088	0.311333	0.859875
TEAD3	0.287388	0.998088	0.878961	0.979475
ADPRS	0.287507	0.998088	0.73812	0.949373
TERF1	0.287707	0.998088	0.238208	0.849901
RTCA	0.287872	0.998088	0.505876	0.905413
SH3GL2	0.287911	0.998088	0.510289	0.908279
GMNN	0.28797	0.998088	0.730466	0.947613
GZMB	0.287999	0.998088	0.343468	0.866131
GMPR2	0.288172	0.998088	0.675049	0.936683
TP53I13	0.288298	0.998088	0.20917	0.838932
FCGR2A	0.288361	0.998088	0.664824	0.934449
SNTN	0.288403	0.998088	0.462879	0.895989
CTF1	0.2888	0.998088	0.145872	0.80253
ZDHHC14	0.288931	0.998088	0.114477	0.786952
EFHD2	0.288986	0.998088	0.439069	0.888165
ARNT	0.289195	0.998088	0.22645	0.84427
IGF2	0.289219	0.998088	0.291172	0.859875
PABPC5	0.289493	0.998088	0.226928	0.844348
SRA1	0.289783	0.998088	0.0443512	0.73847
NRXN1	0.289799	0.998088	0.270737	0.859875
HNMT	0.289821	0.998088	0.389977	0.876645
AOC2	0.289927	0.998088	0.0614388	0.743579
YY1	0.290207	0.998088	0.15691	0.807645
ARHGEF1	0.290227	0.998088	0.28767	0.859875
ZKSCAN7	0.29038	0.998088	0.717096	0.946832
NME4	0.290766	0.998088	0.720044	0.947613
EFNB3	0.291084	0.998088	0.200924	0.838932
MFNG	0.291146	0.998088	0.275752	0.859875
XRCC6	0.291456	0.998088	0.208143	0.838932
SRRT	0.291673	0.998088	0.283734	0.859875
SH3GL3	0.29181	0.998088	0.472593	0.895989
MDP1	0.291964	0.998088	0.602687	0.921323
UBE2N	0.292055	0.998088	0.684067	0.93813
CARD19	0.292119	0.998088	0.742137	0.950859
RDH13	0.292166	0.998088	0.302748	0.859875
KXD1	0.292195	0.998088	0.0727322	0.745109
CDCP1	0.292262	0.998088	0.0466633	0.73847
GC	0.292376	0.998088	0.417955	0.884478
RP2	0.292408	0.998088	0.17391	0.822269
ANXA3	0.292514	0.998088	0.359389	0.866131
CTHRC1	0.293223	0.998088	0.808694	0.969827
PEBP1	0.293278	0.998088	0.798364	0.968915
PCNP	0.293588	0.998088	0.580662	0.91772
GNGT2	0.293607	0.998088	0.677633	0.936683
SLC41A2	0.294631	0.998088	0.0746977	0.749477
NEGR1	0.295279	0.998088	0.0566922	0.73847
C17orf67	0.295311	0.998088	0.159629	0.808764
LMAN2L	0.295444	0.998088	0.469358	0.895989
FH	0.295472	0.998088	0.318326	0.864293
WBP1L	0.295637	0.998088	0.81916	0.97284
FN1	0.296025	0.998088	0.935261	0.989136
HSPA1A	0.296097	0.998088	0.949171	0.990907
RBMS1	0.296305	0.998088	0.496727	0.903631
LAMA4	0.296333	0.998088	0.147297	0.802968
AHSA1	0.296437	0.998088	0.0894149	0.759078
HNRNPA1	0.296466	0.998088	0.212293	0.838932
AK4	0.296485	0.998088	0.0620882	0.744343
TBCEL	0.296586	0.998088	0.682257	0.937862
PFDN5	0.29659	0.998088	0.606765	0.921323
VEGFD	0.296643	0.998088	0.947642	0.990907
MFAP2	0.296707	0.998088	0.412521	0.884478
USP30	0.296716	0.998088	0.46346	0.895989
GPD1L	0.296771	0.998088	0.0786756	0.750258
SELE	0.297139	0.998088	0.0775299	0.749477
RNF34	0.297205	0.998088	0.192262	0.834964
NTF4	0.297234	0.998088	0.0903652	0.759078
KLF9	0.29727	0.998088	0.43764	0.888144
C2orf68	0.297427	0.998088	0.421218	0.884478
DNAJC11	0.29753	0.998088	0.257054	0.854788
FIBCD1	0.297684	0.998088	0.274785	0.859875
LAIR2	0.297921	0.998088	0.620651	0.924066
MEOX2	0.298174	0.998088	0.12488	0.793862
CXADR	0.298299	0.998088	0.312264	0.861179
FARS2	0.298357	0.998088	0.0060669	0.73847
GPN1	0.29867	0.998088	0.612796	0.923361
VSIG8	0.298767	0.998088	0.453577	0.895356
RETNLB	0.298949	0.998088	0.0563496	0.73847
CDNF	0.298951	0.998088	0.590582	0.920212
TWF2	0.298952	0.998088	0.308922	0.859875
SORT1	0.29904	0.998088	0.338937	0.866131
PDXP	0.299132	0.998088	0.564752	0.912646
RGS21	0.299289	0.998088	0.343712	0.866131
OLFM3	0.299399	0.998088	0.994995	0.999287
TNFAIP3	0.299465	0.998088	0.536893	0.910232
KARS1	0.299474	0.998088	0.289025	0.859875
TATDN1	0.299492	0.998088	0.646915	0.929744
MSMP	0.29951	0.998088	0.727636	0.947613
DDRGK1	0.29952	0.998088	0.647729	0.930304
CA2	0.299543	0.998088	0.428304	0.884556
ADSS2	0.299546	0.998088	0.0380547	0.73847
DCAF11	0.299608	0.998088	0.288016	0.859875
RPS27A	0.299738	0.998088	0.420399	0.884478
SUMO2	0.299746	0.998088	0.452922	0.895356
MVB12B	0.299896	0.998088	0.637015	0.928553
ESD	0.299919	0.998088	0.557862	0.910738
BAG4	0.299984	0.998088	0.243319	0.849901
LETMD1	0.300048	0.998088	0.152335	0.803977
PES1	0.300143	0.998088	0.0767132	0.749477
SPAST	0.300146	0.998088	0.458169	0.895989
HSPA8	0.300365	0.998088	0.921451	0.987279
NME7	0.300446	0.998088	0.679736	0.93765
KLK13	0.300629	0.998088	0.610993	0.923011
CLIC1	0.300931	0.998088	0.852103	0.976096
PPARG	0.301016	0.998088	0.0965503	0.768608
MGA	0.30169	0.998088	0.987394	0.998352
ARHGAP6	0.301839	0.998088	0.47779	0.895989
TFAM	0.301852	0.998088	0.47342	0.895989
S100A6	0.301856	0.998088	0.634386	0.926723
LYN	0.301859	0.998088	0.156179	0.807645
A1CF	0.302267	0.998088	0.718412	0.946832
SULT1B1	0.30261	0.998088	0.373729	0.868921
TPM4	0.302662	0.998088	0.369742	0.868773
ST8SIA1	0.302786	0.998088	0.0270789	0.73847
C1RL	0.302859	0.998088	0.345826	0.866131
DEFB129	0.302925	0.998088	0.325833	0.864624
HSD17B4	0.303048	0.998088	0.122572	0.790179
OMD	0.30305	0.998088	0.688953	0.93865
CANT1	0.303074	0.998088	0.573094	0.915505
AREG	0.303082	0.998088	0.619726	0.924066
SPINK9	0.303107	0.998088	0.780611	0.962125
OVCA2	0.303172	0.998088	0.887117	0.981326
ANGPTL3	0.303179	0.998088	0.388952	0.876645
PECR	0.303185	0.998088	0.195762	0.835636
SMIM13	0.303203	0.998088	0.116745	0.78991
LYSMD4	0.303233	0.998088	0.109669	0.781963
ZNF415	0.303318	0.998088	0.133699	0.793862
EIF1AD	0.303325	0.998088	0.252673	0.849901
GOLM1	0.303394	0.998088	0.391193	0.877924
ARHGEF2	0.303552	0.998088	0.463209	0.895989
IGF2R	0.303737	0.998088	0.732112	0.947613
MATK	0.30377	0.998088	0.336022	0.866131
AGO2	0.303779	0.998088	0.60503	0.921323
SPART	0.303857	0.998088	0.234782	0.849045
ZBP1	0.303929	0.998088	0.454763	0.895642
CCNH	0.303937	0.998088	0.0365818	0.73847
PA2G4	0.303946	0.998088	0.320197	0.864497
C1D	0.304087	0.998088	0.0796275	0.750258
LRP6	0.304097	0.998088	0.0616284	0.743579
PID1	0.304161	0.998088	0.335117	0.866131
TNFRSF10B	0.3043	0.998088	0.132109	0.793862
SOD3	0.304855	0.998088	0.116332	0.789519
[truncated: 5,290 more rows]

## Sheet: Intersection PFS OS (p<0.05)
Protein	p-value PFS	p-value OS
SKP1	0.00851264	8.04422e-05
MED28	0.0158973	0.000774521
VARS1	0.0022753	0.000803275
TNR	0.00559823	0.00160296
CYREN	0.00122544	0.00190529
PLCD3	0.000462689	0.00191736
HPX	0.00536055	0.00230838
ITIH2	0.00551689	0.00257786
PRKCD	0.0252089	0.0027628
HS3ST3A1	0.0197777	0.00296287
SORCS2	0.0305039	0.00326044
AZIN1	0.00994638	0.00333283
SERPINA3	0.00847472	0.00337805
FAIM	0.045695	0.00338813
TF	0.0154894	0.00340354
CDSN	0.0288732	0.00349412
MRPL32	0.0289021	0.00358416
IDS	0.015803	0.00362459
FAM204A	0.0287163	0.0036903
RGS19	0.0496035	0.00402459
ETS2	0.00831629	0.00405207
KIR2DL4	0.00321504	0.00406087
STAB2	0.00894159	0.00412161
CFP	0.0445474	0.00493353
POLE3	0.0273061	0.00507971
KNG1	0.00497374	0.00512215
NDRG3	0.0212018	0.00527473
PIWIL1	0.0394723	0.00664146
C3	0.0261765	0.00713776
CISD2	0.0110218	0.00725994
CD80	0.0337431	0.00790723
RRBP1	0.0104142	0.00812903
SELP	0.0203004	0.00832919
CRLF2	0.0309994	0.00834173
SLC6A16	0.0322509	0.00870635
FIS1	0.0428301	0.00880462
MATN3	0.0201222	0.00932416
FGF2	0.0275614	0.00943684
PNPLA2	0.0181476	0.00993582
STX12	0.0488749	0.0103788
MENT	0.0365603	0.0105582
CTNNA2	0.0186832	0.0108045
TGM4	0.00108752	0.0112063
RASSF5	0.0441387	0.0117124
VPS53	0.023184	0.0118992
SEPTIN1	0.0373793	0.0122753
CD38	0.0437852	0.0122943
HPX	0.0181513	0.0126547
INHBC	0.0274534	0.0132784
PLCXD3	0.0167862	0.0142091
SGK1	0.0373724	0.0152036
USH1C	0.0314534	0.016636
SEMA3B	0.00641389	0.0171576
DEFB128	0.032453	0.0172599
WIF1	0.0114493	0.0174452
ANXA7	0.0381197	0.0180729
KPNA1	0.0328587	0.018551
TK1	0.03076	0.0194737
DEFB127	0.00965536	0.0197191
TNFRSF13B	0.0157339	0.0201696
ADGRE2	0.0133155	0.020393
GSTK1	0.0418442	0.020659
PPP3R2	0.0458447	0.0210054
LTA	0.0492775	0.0223388
EYS	0.0299359	0.0223499
DDX46	0.0133994	0.0230741
TMEM190	0.0386597	0.023381
FNTA	0.0085488	0.023696
NTN1	0.0189383	0.0240709
SPARC	0.0231007	0.0241929
NCF2	0.00791513	0.0242323
PRDM1	0.0277925	0.0254969
DRG1	0.0419735	0.0257986
FRZB	0.0118502	0.0261994
ITGA5	0.048608	0.0269862
COPE	0.00613315	0.0276823
CARD17	0.0484383	0.0282729
STAB1	0.0497119	0.0285144
KMO	0.0478903	0.0287773
ARF6	0.0252899	0.0294459
APBB1	0.0160771	0.0296821
FABP9	0.047528	0.0300116
MUC1	0.0111382	0.030057
FGA	0.0126701	0.0304018
ADH1A	0.0193802	0.0304901
ITCH	0.0170037	0.0304945
FAHD1	0.0244466	0.030643
SF3B6	0.0293137	0.0316195
ANKRD27	0.0270778	0.0331164
DEFB135	0.0333607	0.0345617
SDCBP	0.0204713	0.0366093
SKA1	0.0443353	0.0369943
ANGPT1	0.0353778	0.0372509
NHP2	0.0343507	0.0373147
APOC1	0.0368272	0.0373464
HOPX	0.0425223	0.037705
UBE2F	0.0194261	0.0387869
SDHAF2	0.036927	0.0392995
SIRPA	0.0444313	0.0393016
PCDH12	0.00586952	0.0394213
MSTN	0.0138281	0.0411266
TBX5	0.0204553	0.0413013
IL12RB2	0.0371133	0.0417874
HTATIP2	0.0123013	0.0436929
DPYSL2	0.00689174	0.0446886
PRRG1	0.0387259	0.0447362
BID	0.0205196	0.0449504
REG3G	0.0447063	0.0474663
WFIKKN2	0.0395014	0.0475539
STAT5B	0.0442533	0.0477681
BRDT	0.0440144	0.0484292
EIF4H	0.0404772	0.0488021
