# Supplementary material for: Revisiting Concurrent Radiation Therapy, Temozolomide, and the Histone Deacetylase Inhibitor Valproic Acid for Patients with Glioblastoma—Proteomic Alteration and Comparison Analysis with the Standard-of-Care Chemoirradiation
Source: MDPI journal article supplement (doi:10.3390/biom13101499), 2023-10-10
Supplement: s1 [file s1 › Supplementary file S4.pdf]

| Symbol                        | Name                                                               | Relevance to cancer | Relevance in GBM                           |
|-------------------------------|--------------------------------------------------------------------|---------------------|--------------------------------------------|
| <b>Prognostic</b>             |                                                                    |                     |                                            |
| CCL17                         | C-C motif chemokine ligand 17                                      | Yes                 | Yes (refs already in discussion)           |
| GALNT14                       | Polypeptide N-acetylgalactosaminyltransferase 14                   | Yes                 | Yes (refs already in discussion)           |
| CTSV                          | Cathepsin V                                                        | Yes[73]             | Possible[74]                               |
| ACP6                          | Acid phosphatase 6, lysophosphatidic                               | Yes[75]             | Possible[76]                               |
| BMP6                          | Bone morphogenetic protein 6                                       | Yes[77]             | Yes[78]                                    |
| MSTN                          | Myostatin                                                          | Yes[79]             | Yes[80]                                    |
| SLITRK6                       | SLIT and NTRK like family member 6                                 | Yes[81]             | Yes (may be CNS and/or tumor defining)[82] |
| ICAM4                         | Intercellular adhesion molecule 4 (Landsteiner-Wiener blood group) | Yes[83]             | Yes[84]                                    |
| NPTX1                         | Neuronal pentraxin 1                                               | Yes[85]             | Yes (neurodegeneration)[86]                |
| SLITRK5                       | SLIT and NTRK like family member 5                                 | Yes[87]             | Yes (may be CNS and/or tumor defining)[82] |
| <b>Potentially predictive</b> |                                                                    |                     |                                            |
| PLCD3                         | Phospholipase C Delta 3                                            | Yes                 | Yes (refs already in discussion)           |
| SKP1                          | S-phase kinase-associated protein 1                                | Yes                 | Yes (refs already in discussion)           |
| VAR1                          | Valyl-tRNA synthetase 1                                            | Not defined         | Yes (seizures)[88]                         |
| CYREN                         | Cell cycle regulator of NHEJ                                       | Yes[89]             | Yes (management) [90]                      |
| KIR2DL4                       | Killer cell immunoglobulin-like receptor 2DL4                      | Yes[91]             | Yes (immune microenvironment)[92]          |
